# Supplementary material
Source: PubMed Central journal article supplement (PMC3749500)
Supplement: ismej201361x2.pdf [file ismej201361x2.pdf]

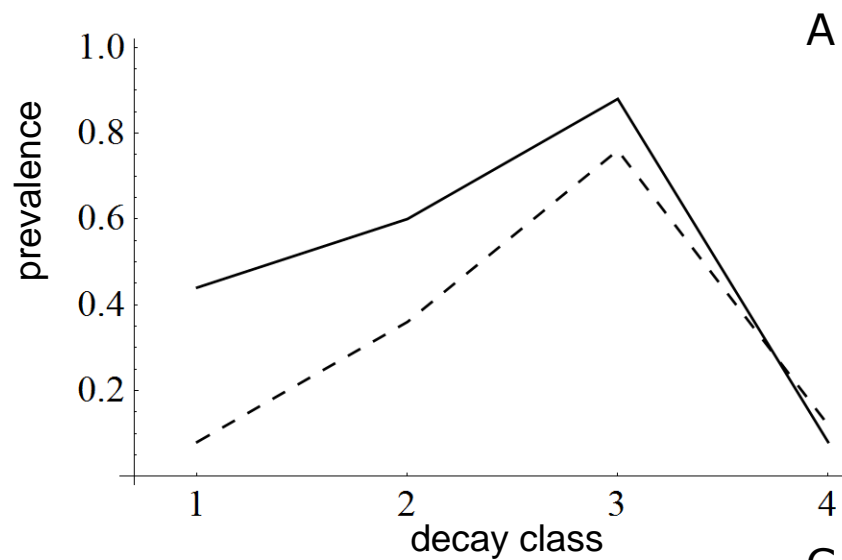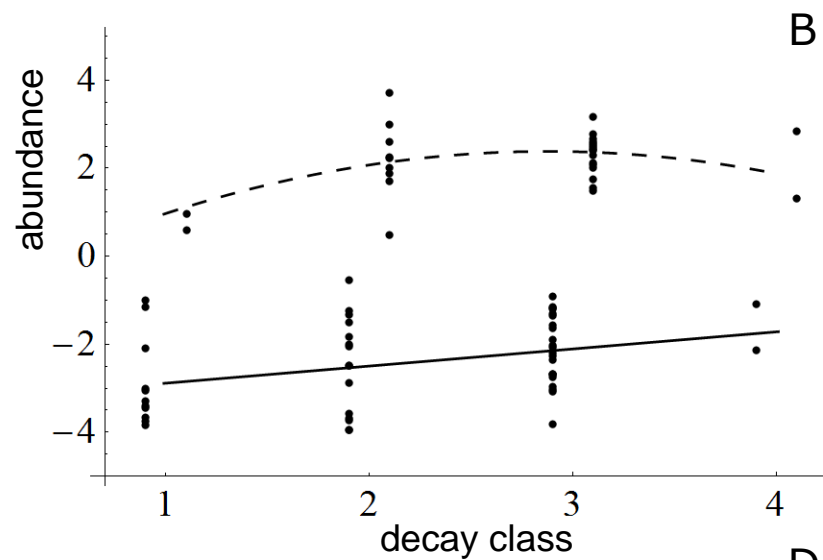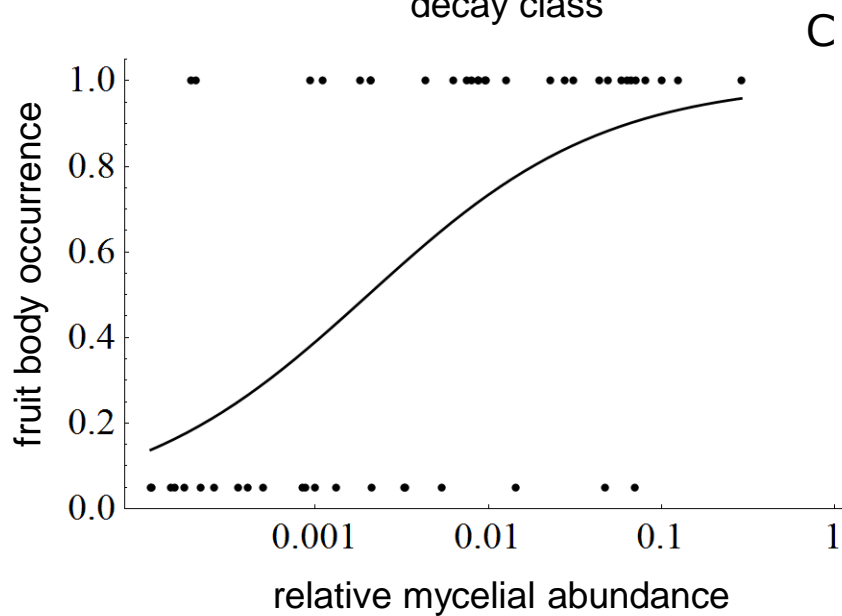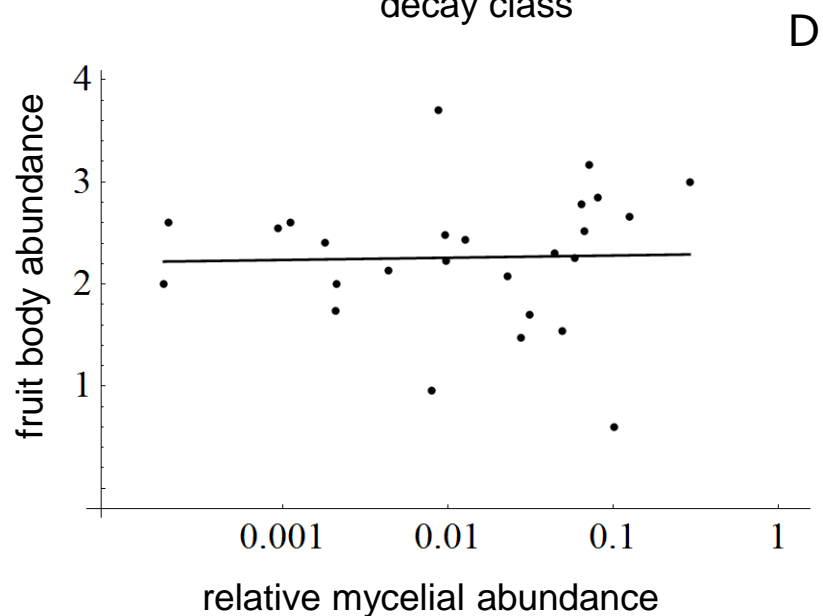

*Antrodia serialis*

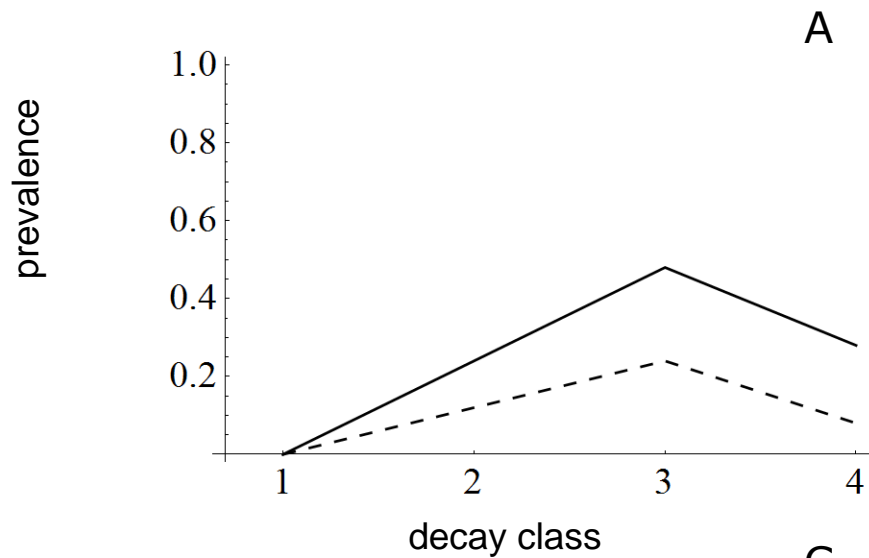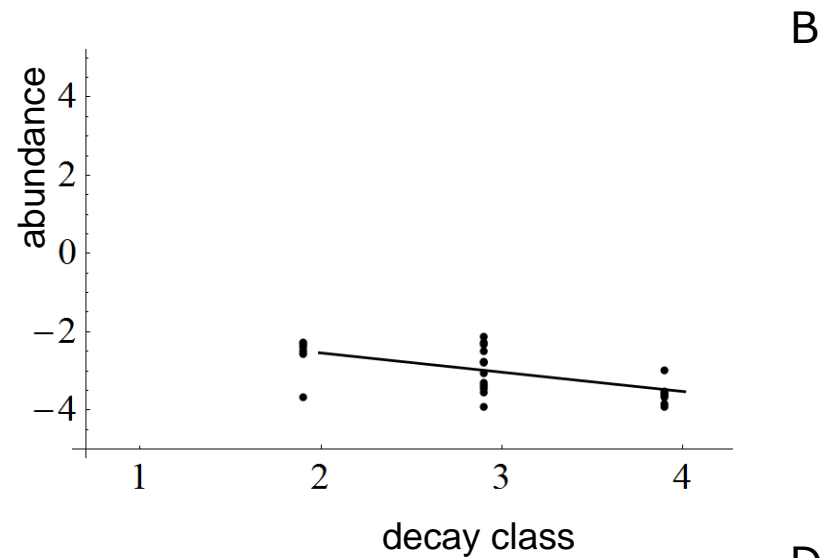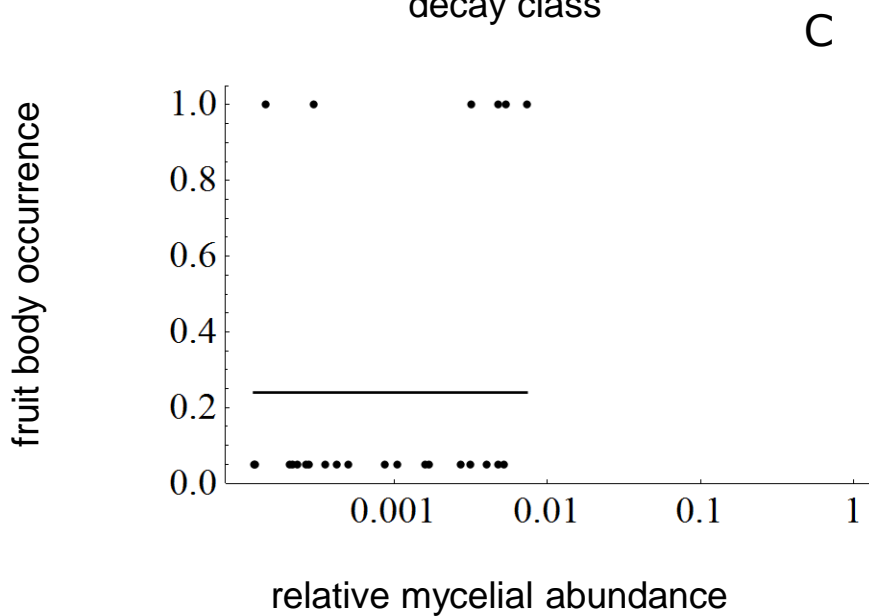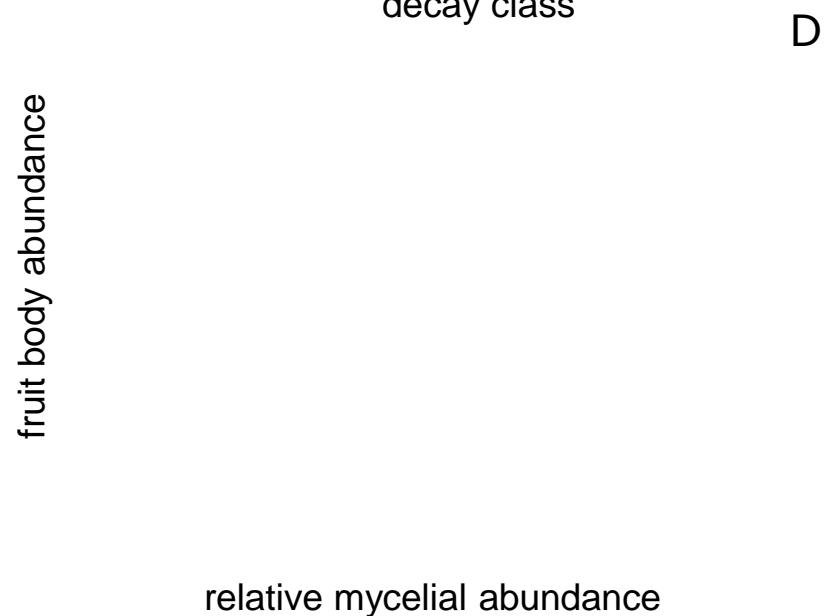

*Athelia decipiens*

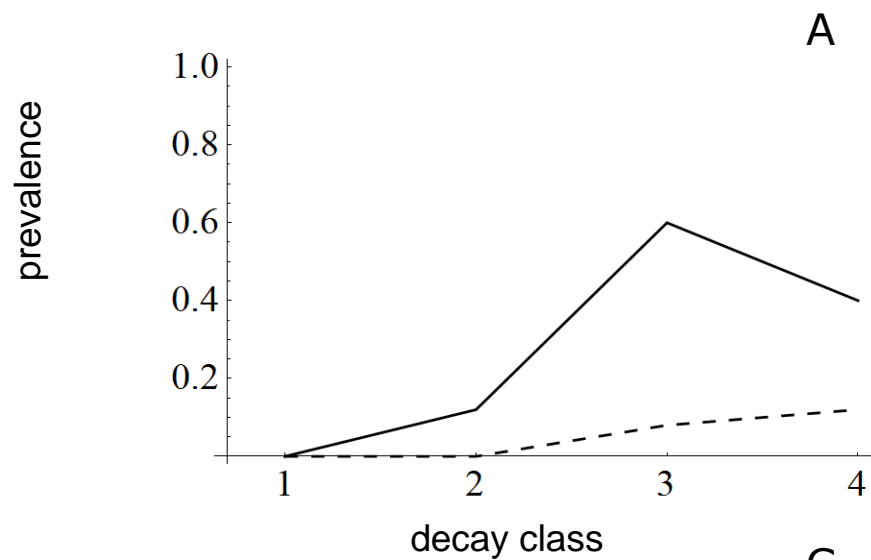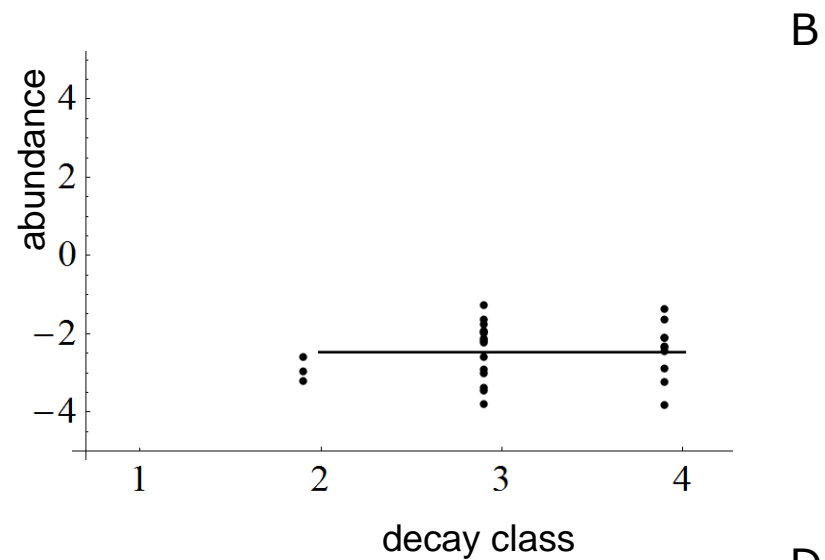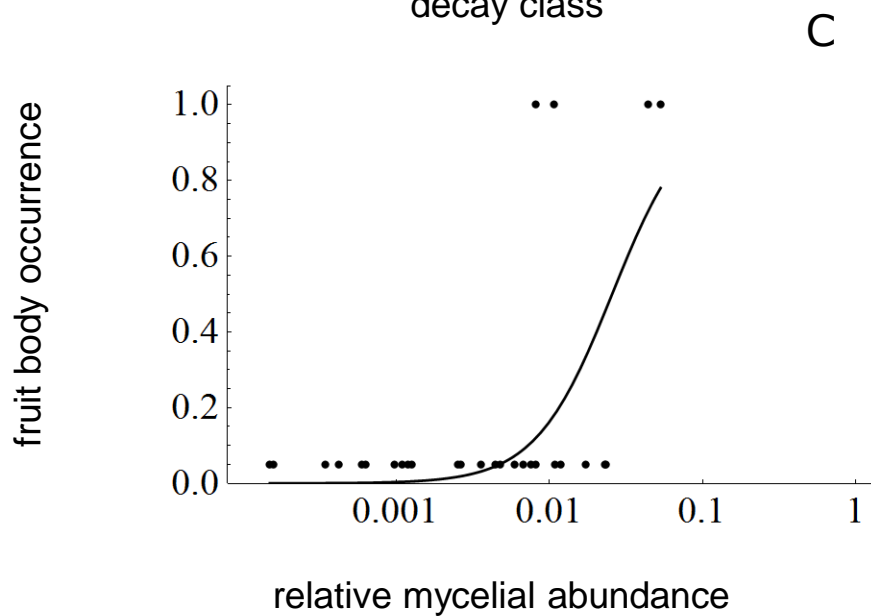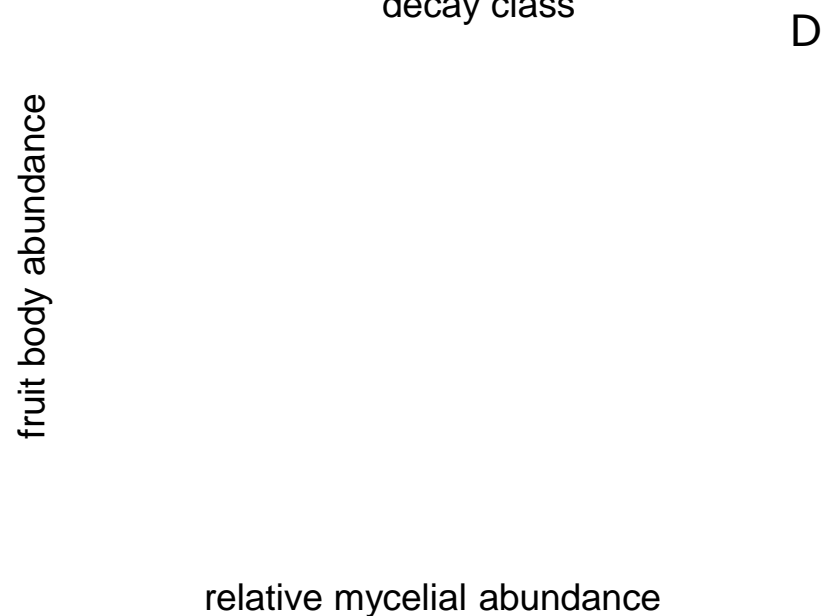

*Athelopsis subinconspicua*

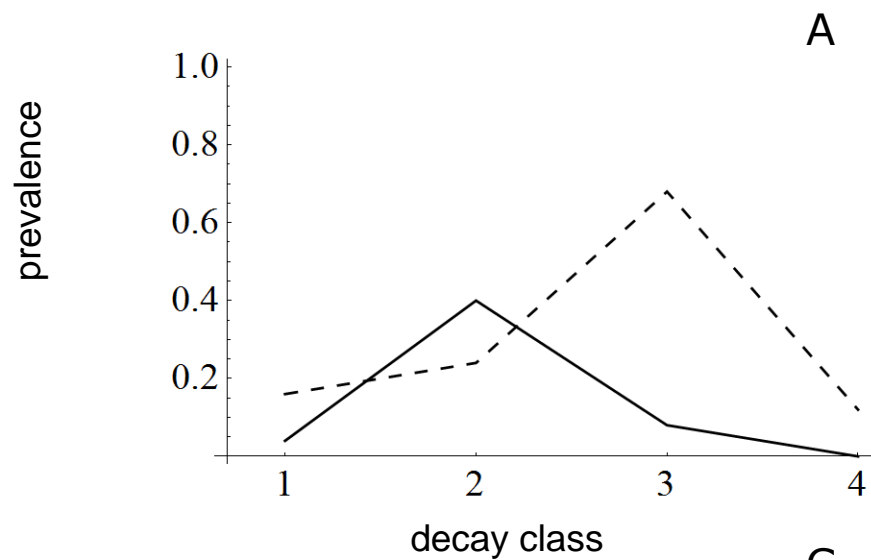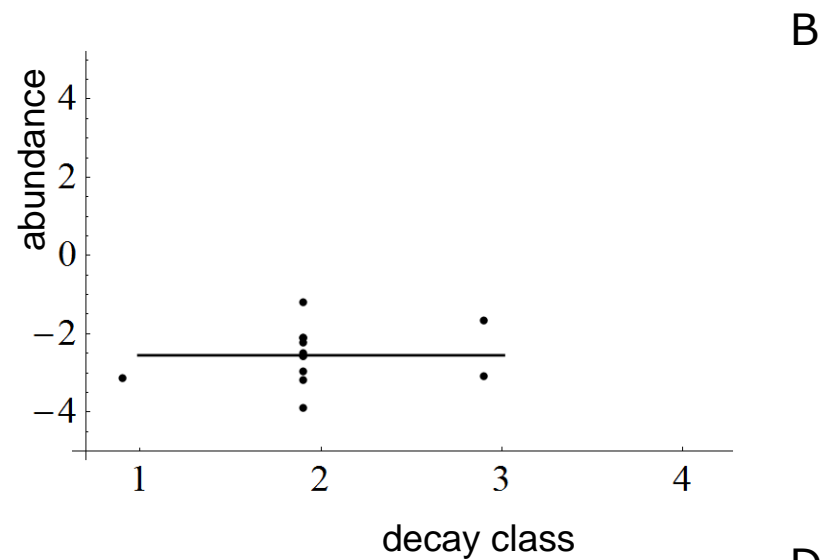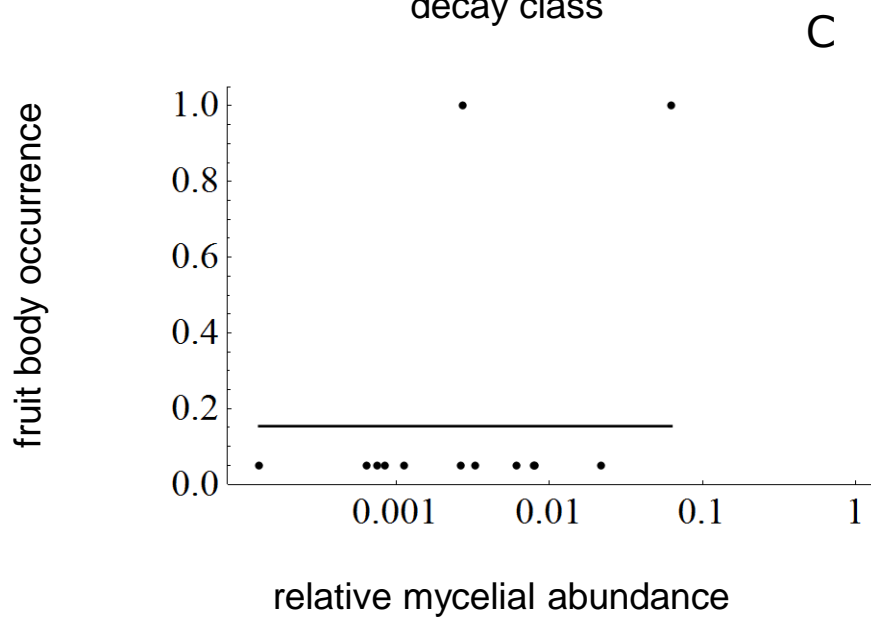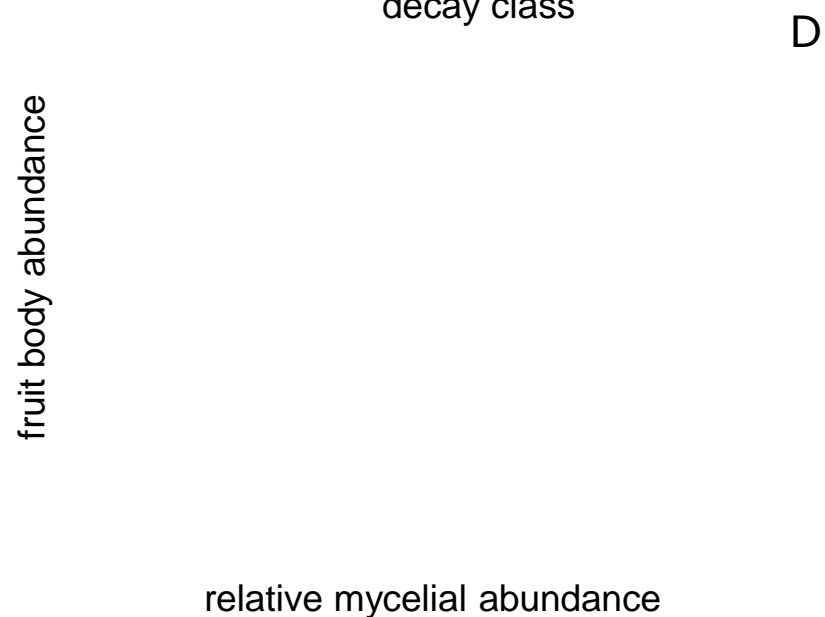

*Botryobasidium obtusisporum*

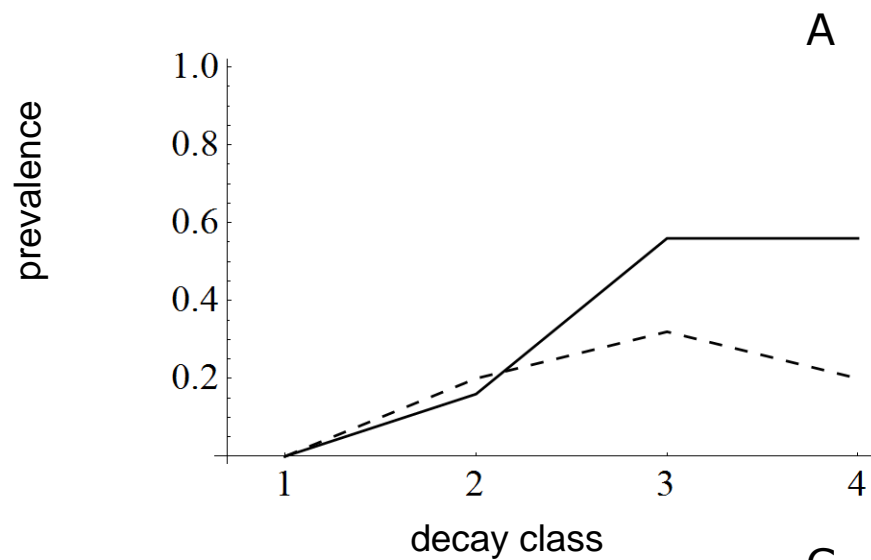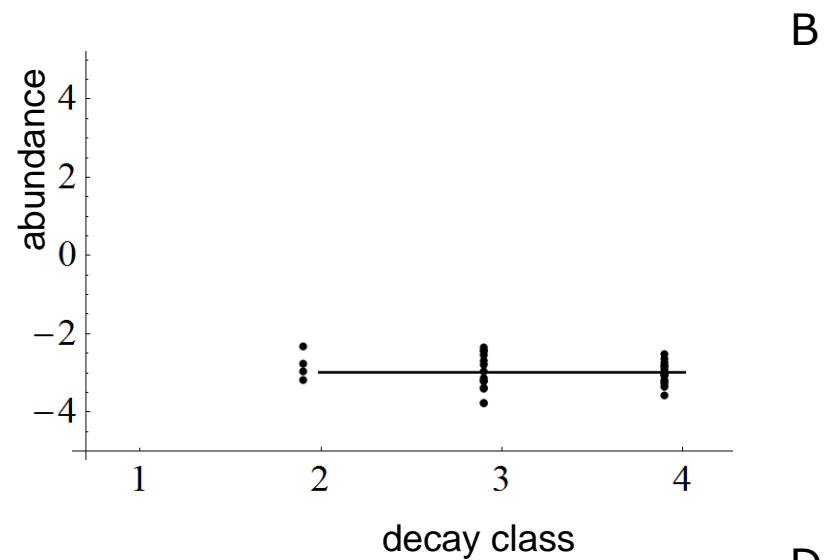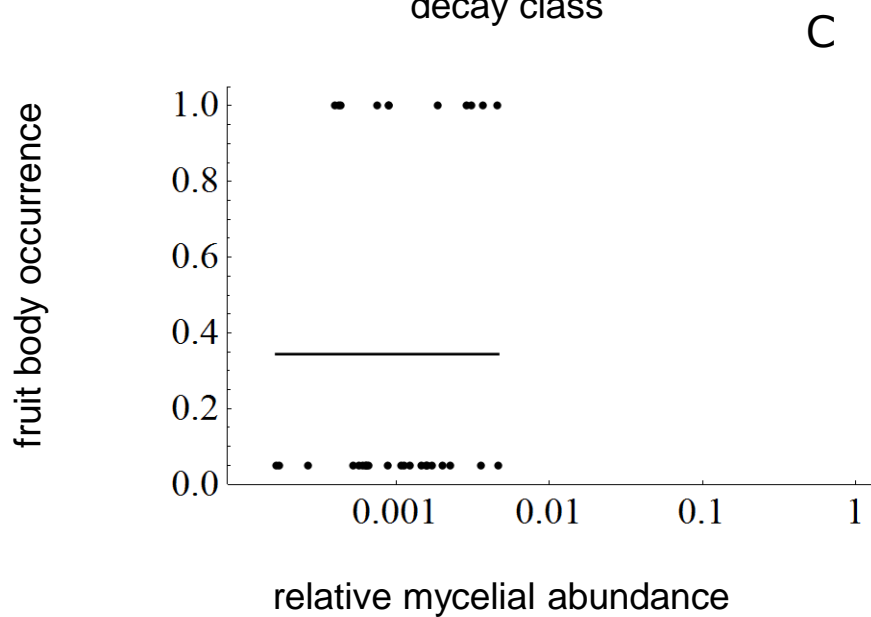

*Botryobasidium subcoronatum*

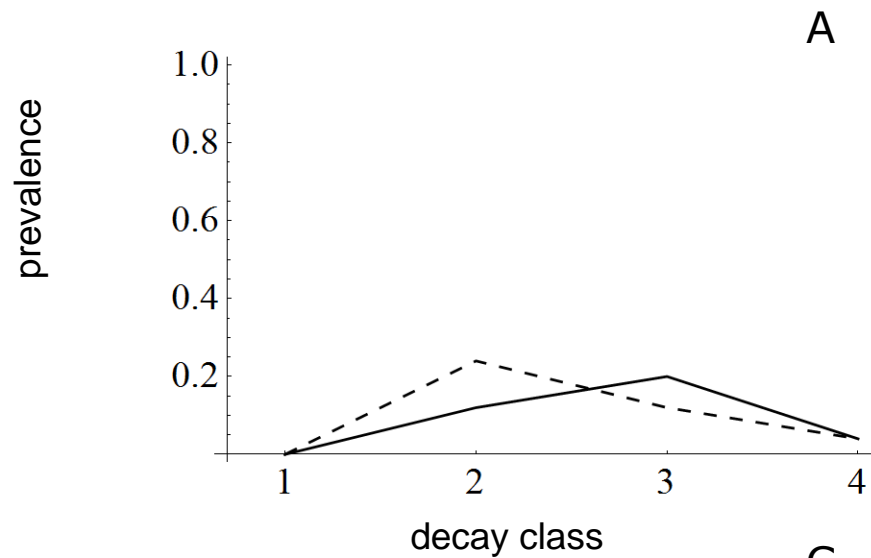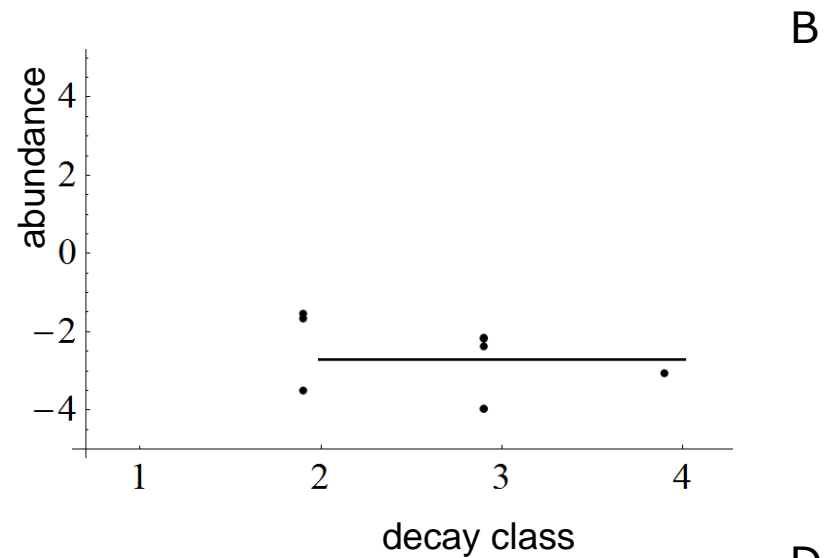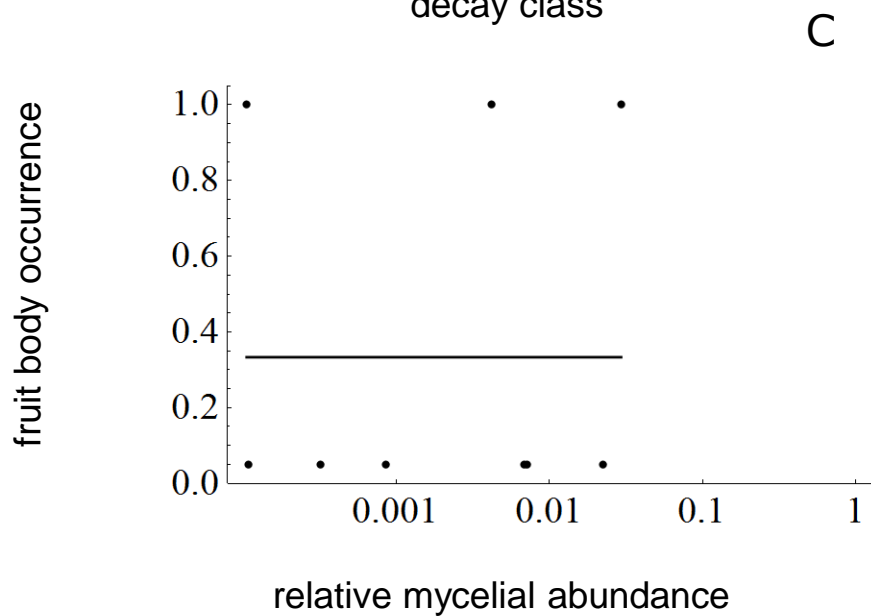

*Coniophora arida*

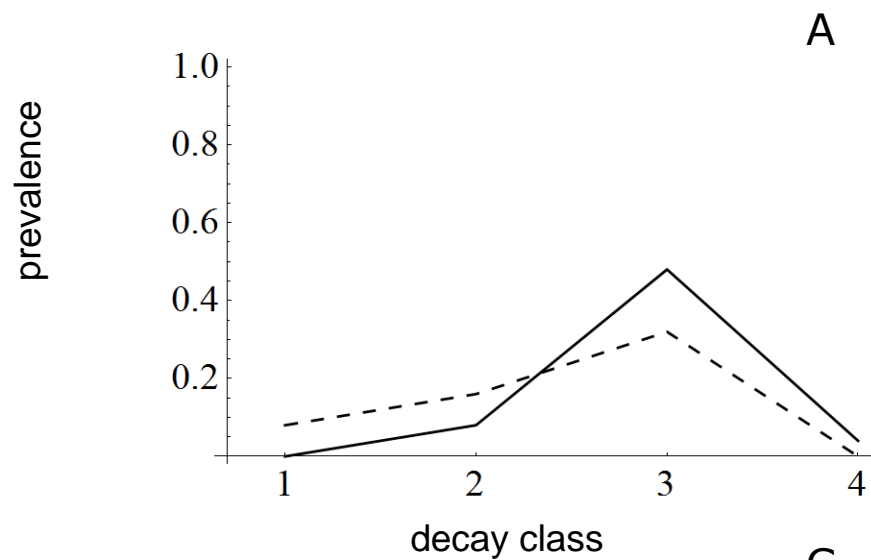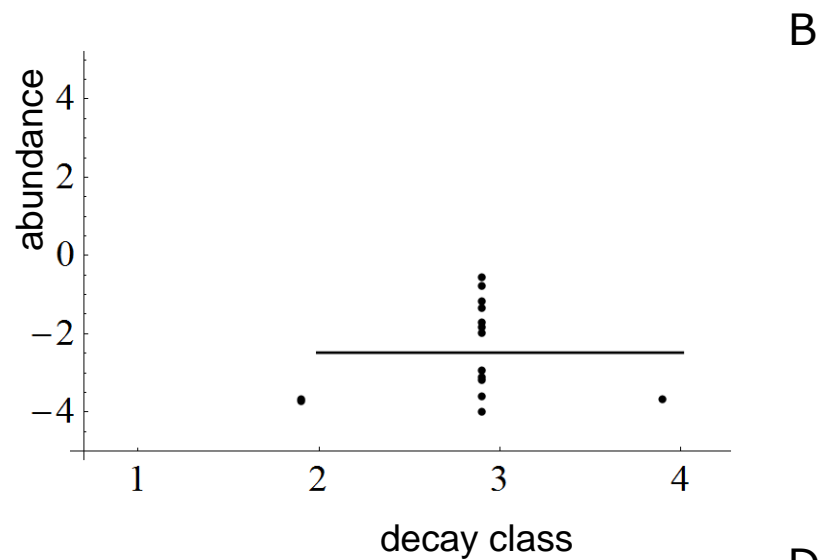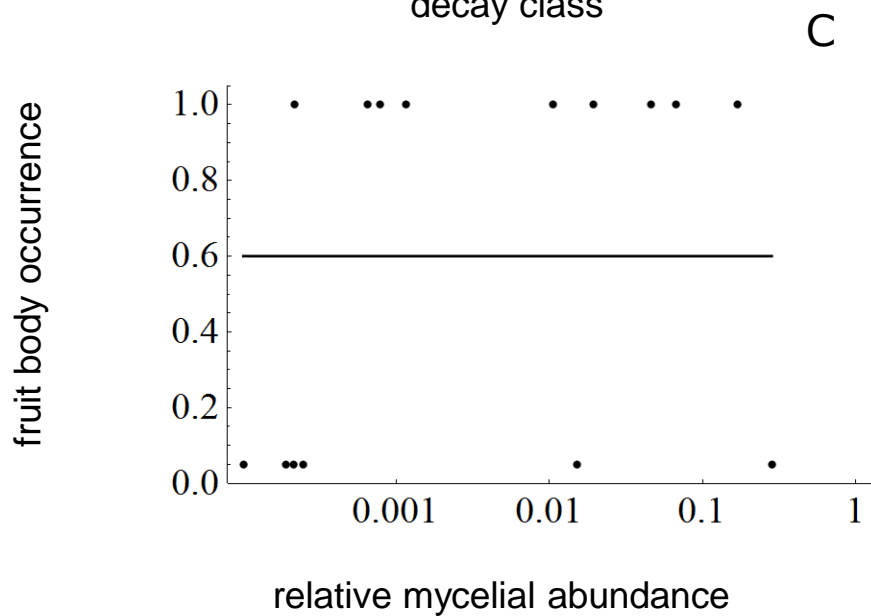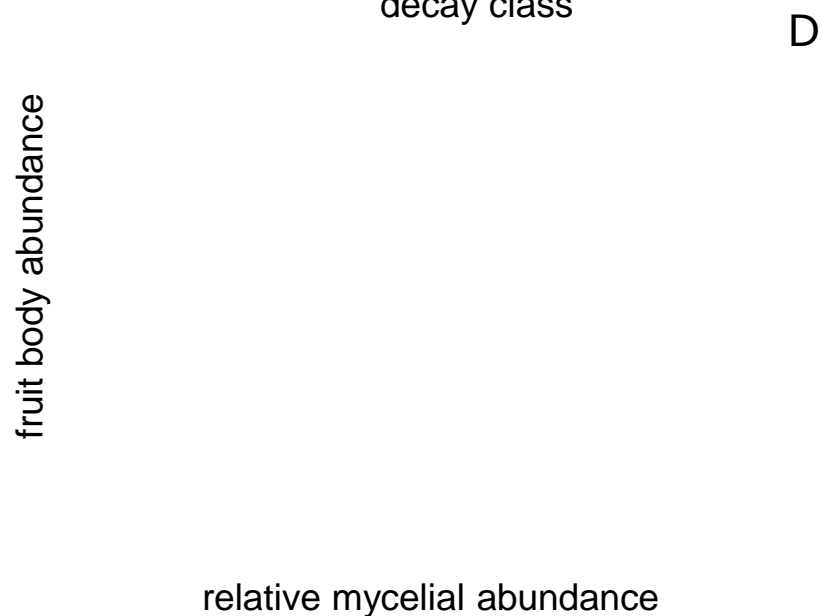

*Coniophora olivacea*

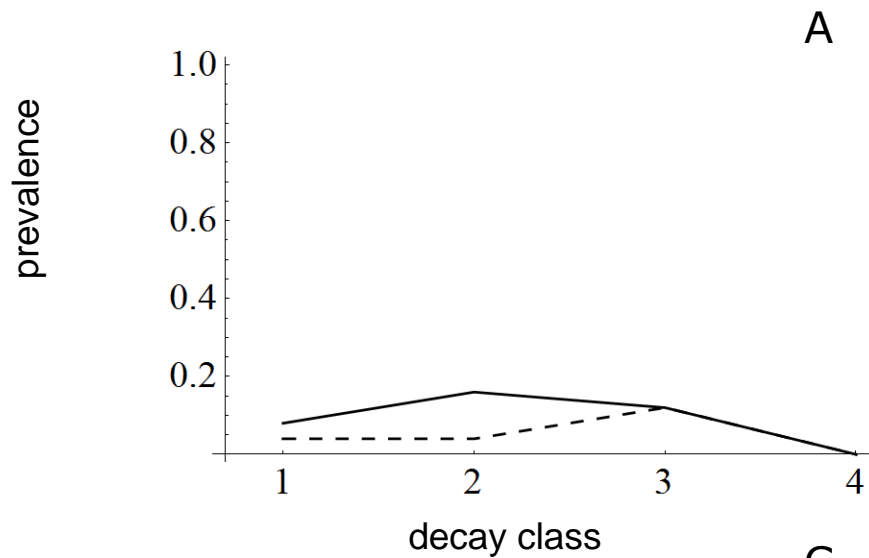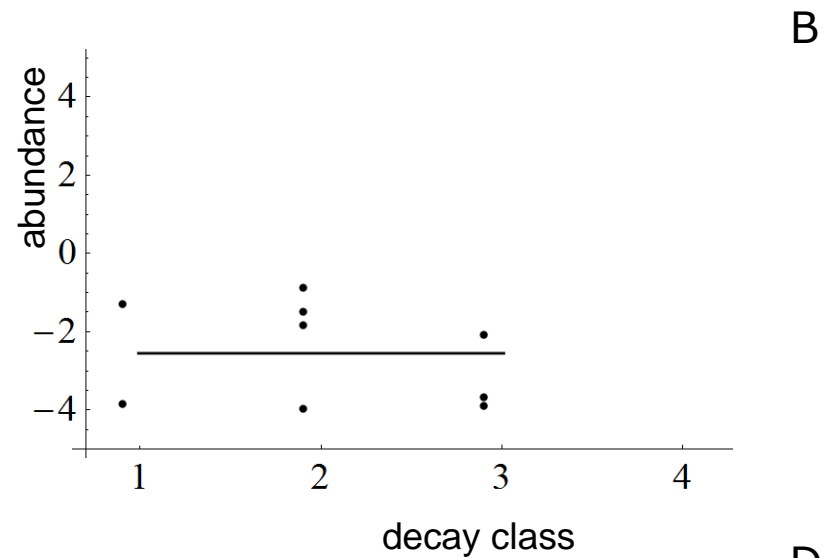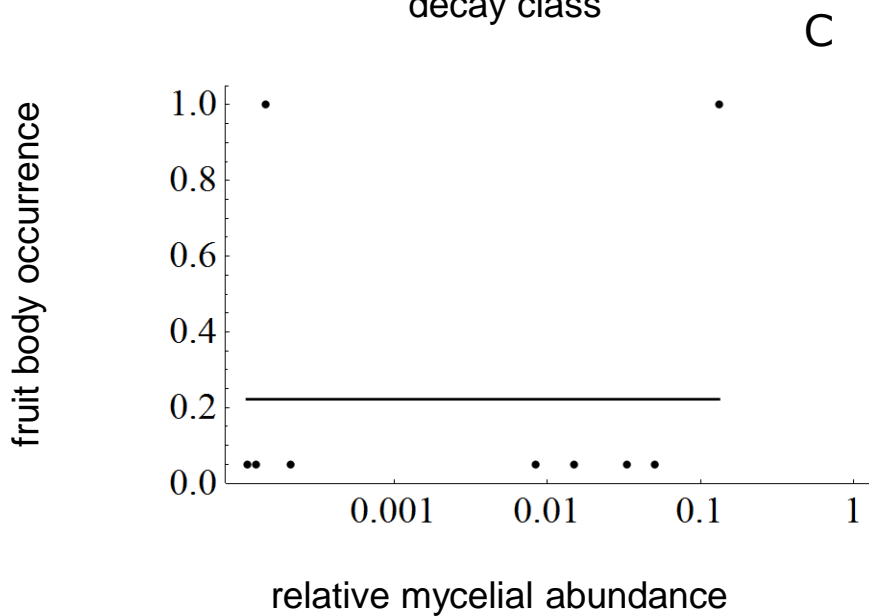

*Coniophora puteana*



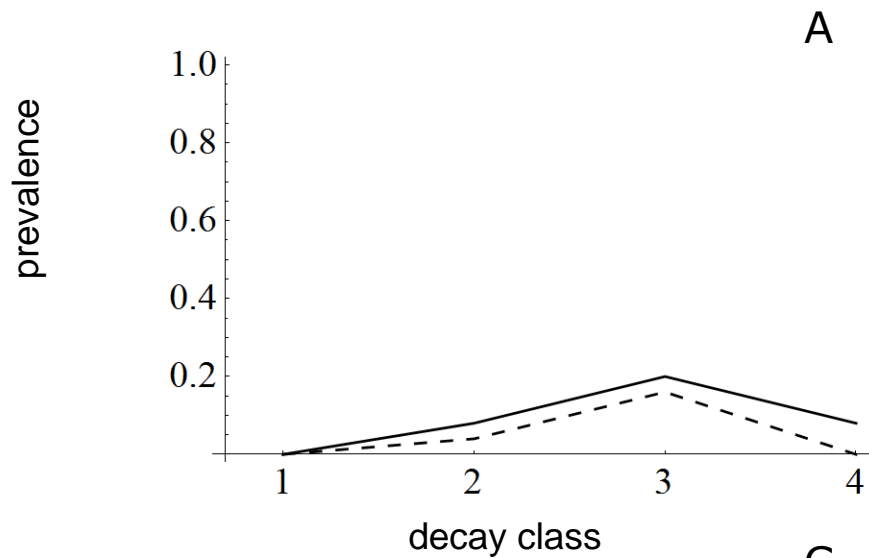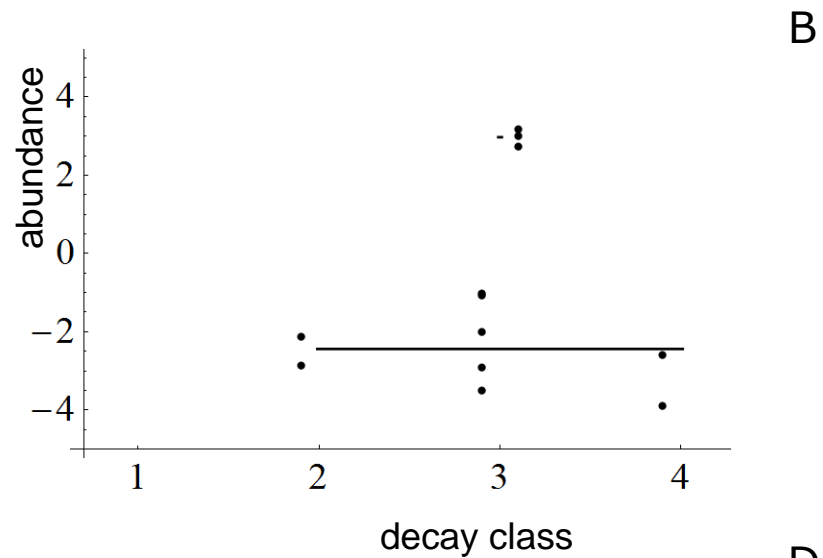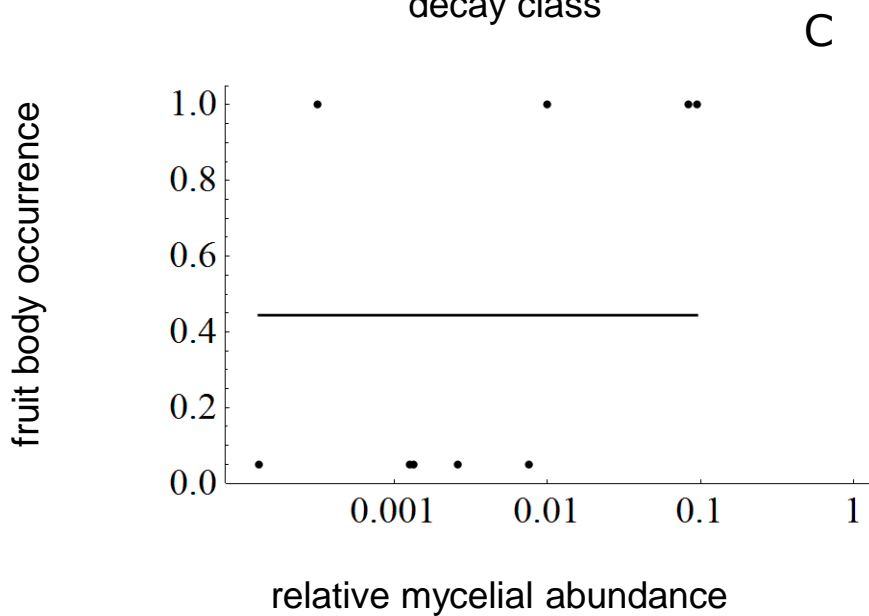

*Crustoderma dryinum*

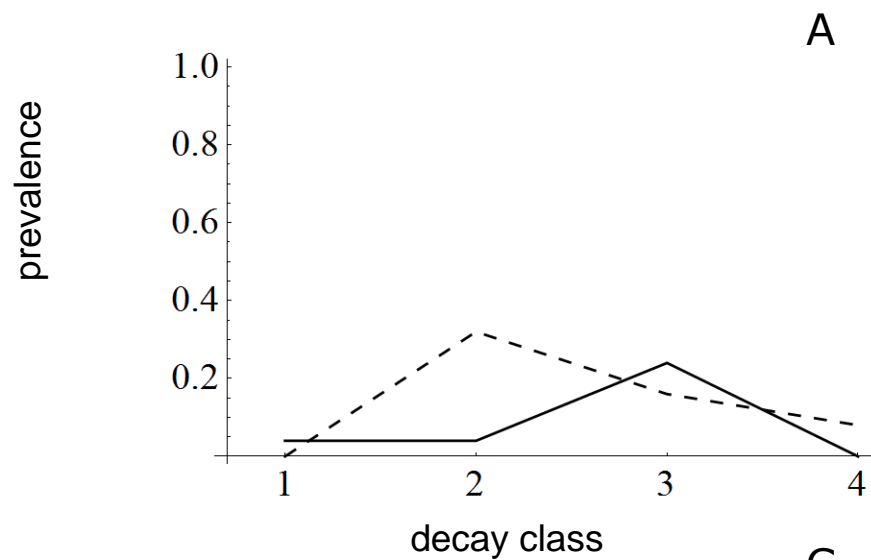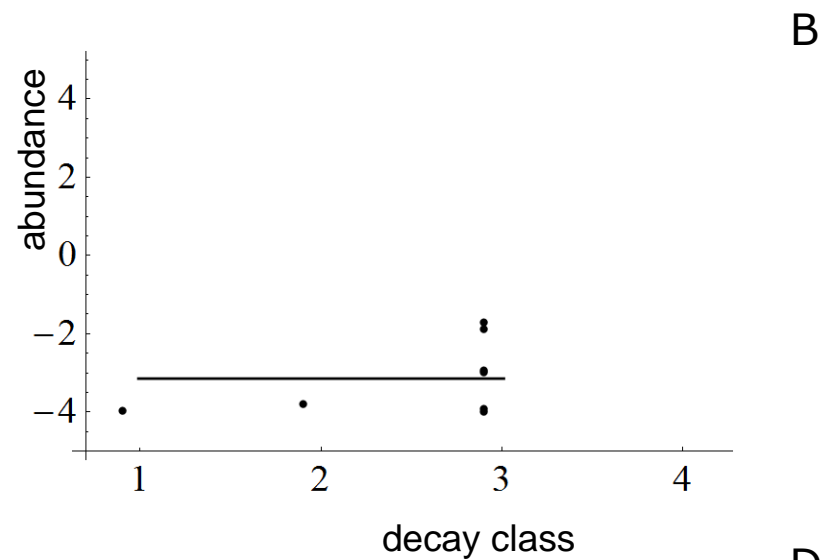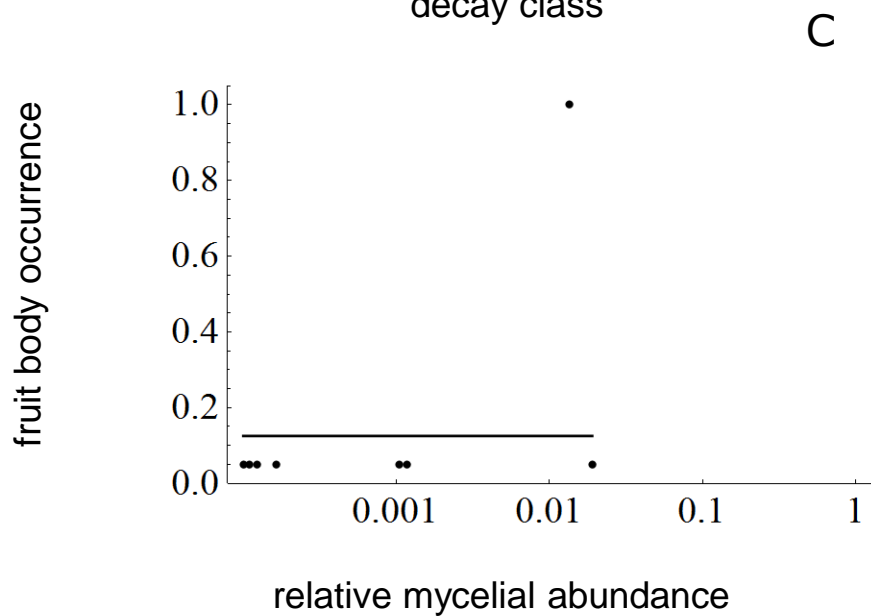

*Dacrymyces stillatus*

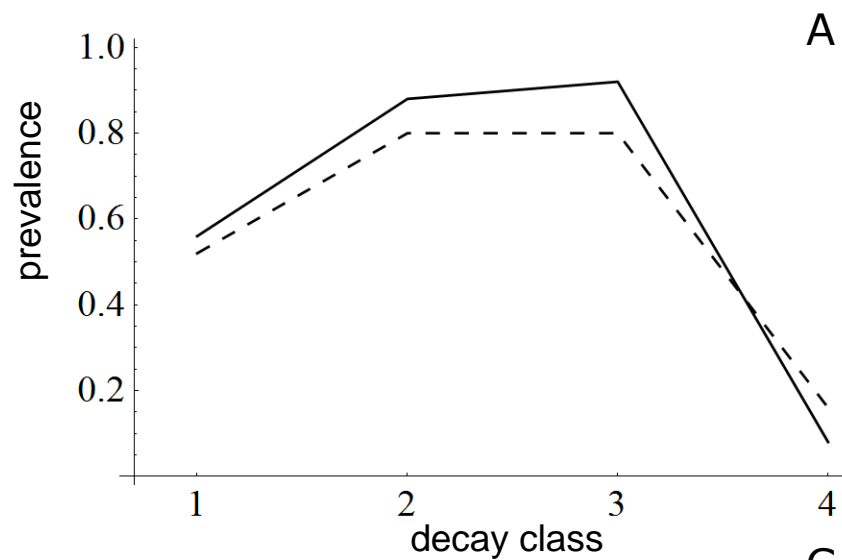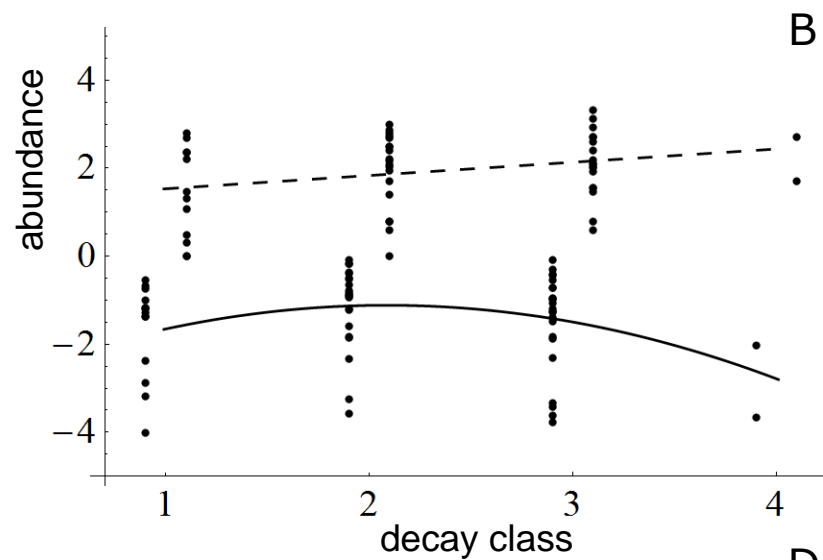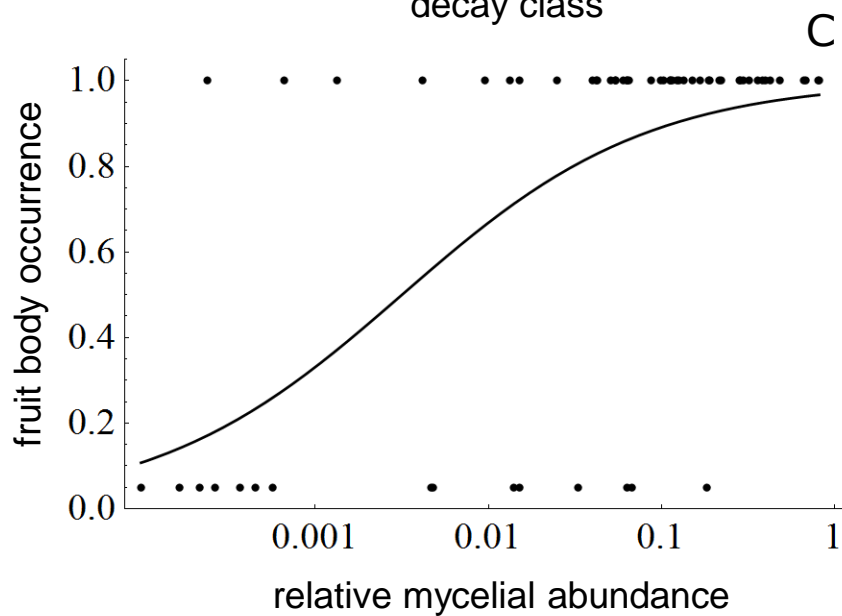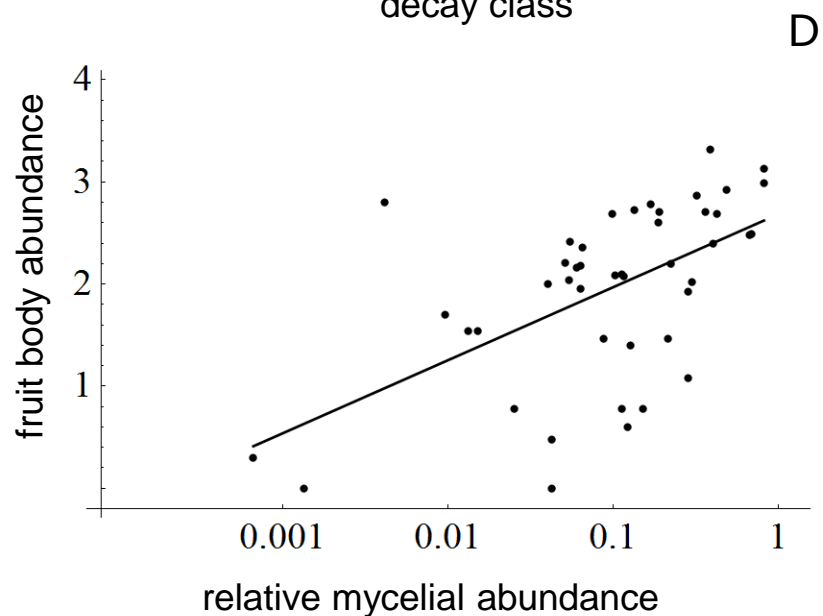

*Fomitopsis pinicola*

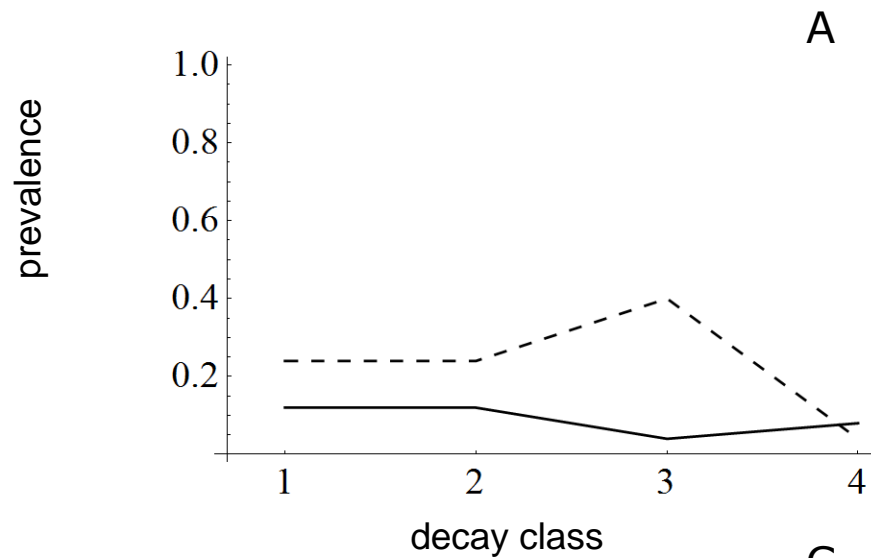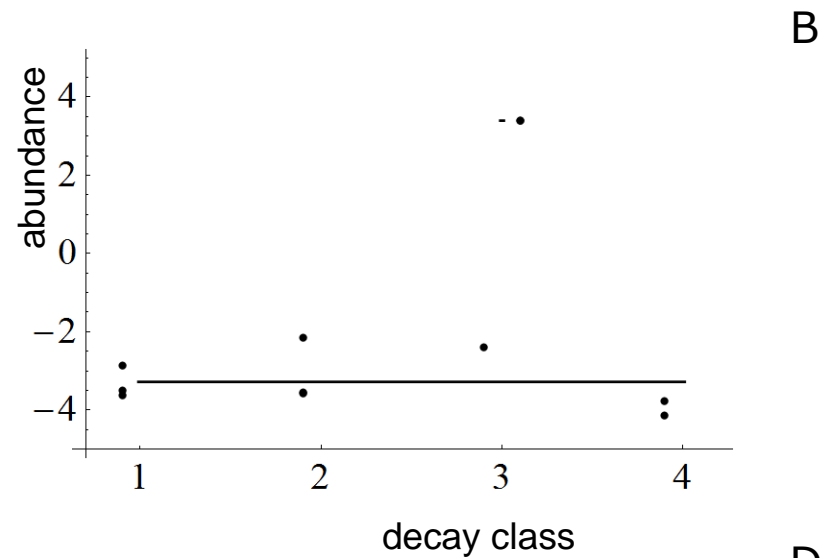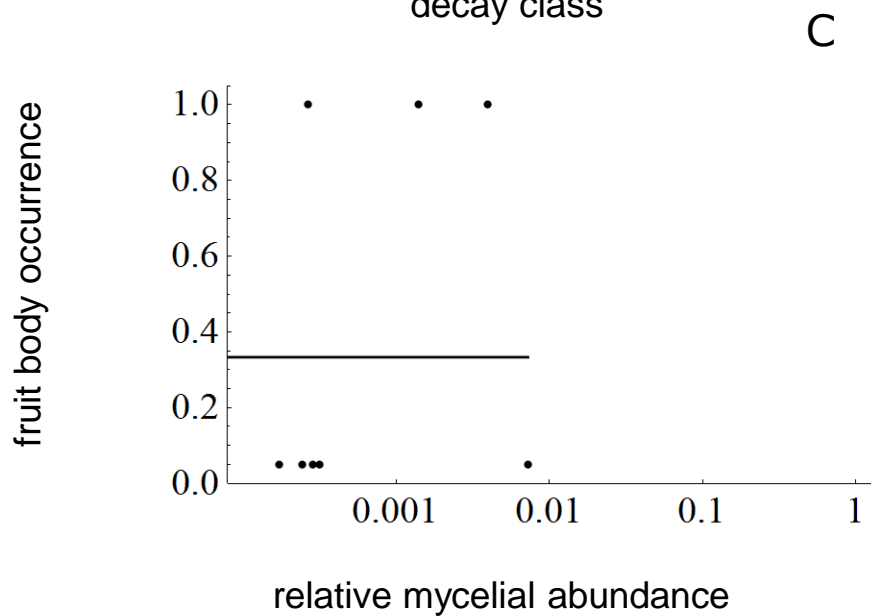

Globulicium hiemale

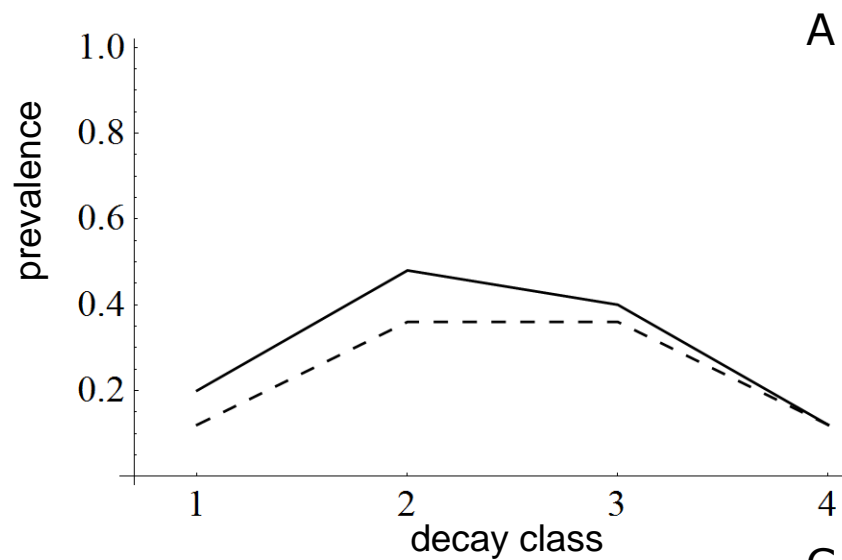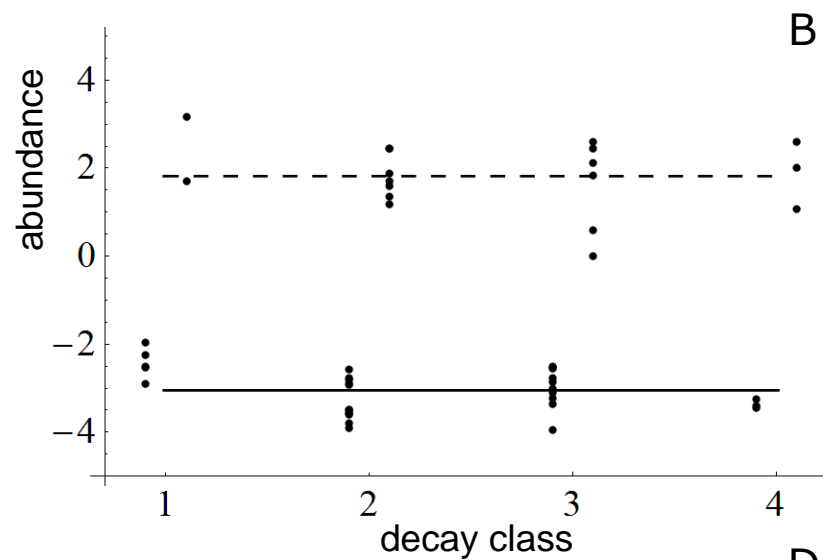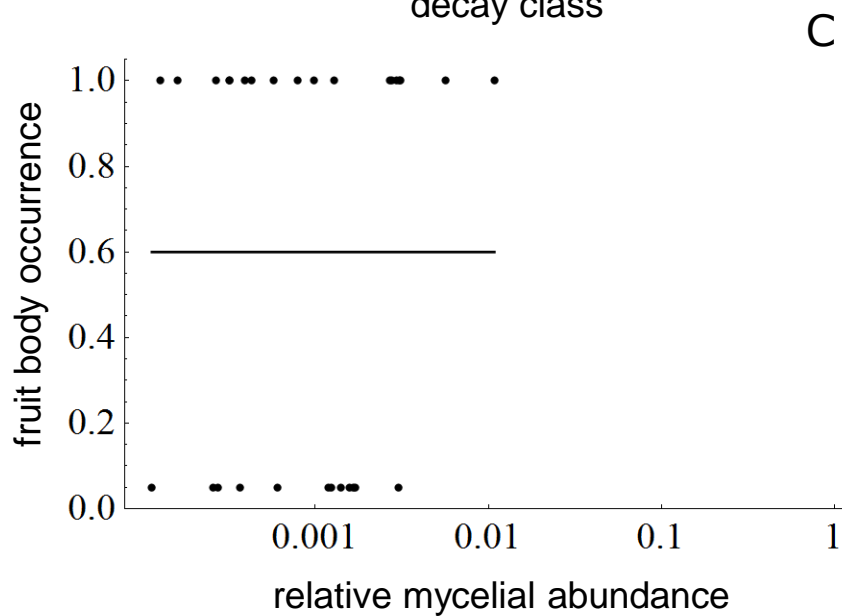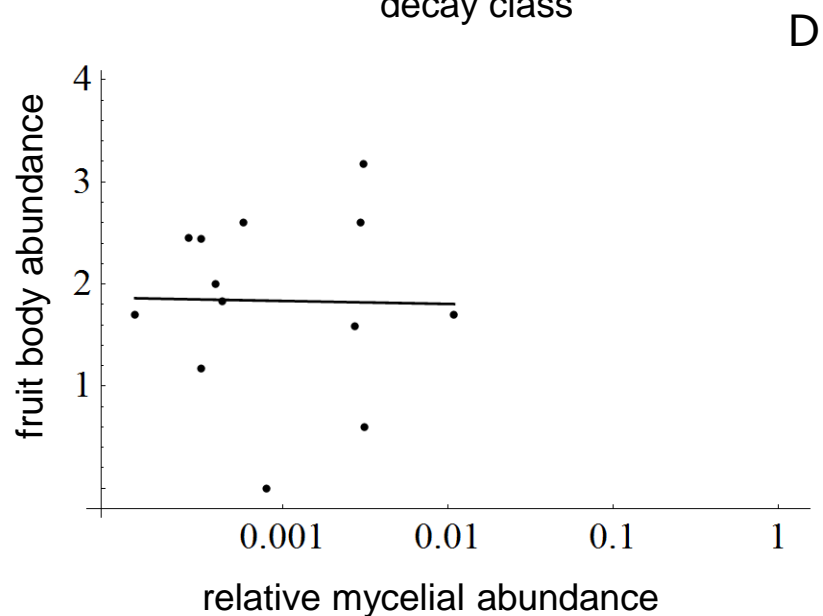

Heterobasidion parviporum

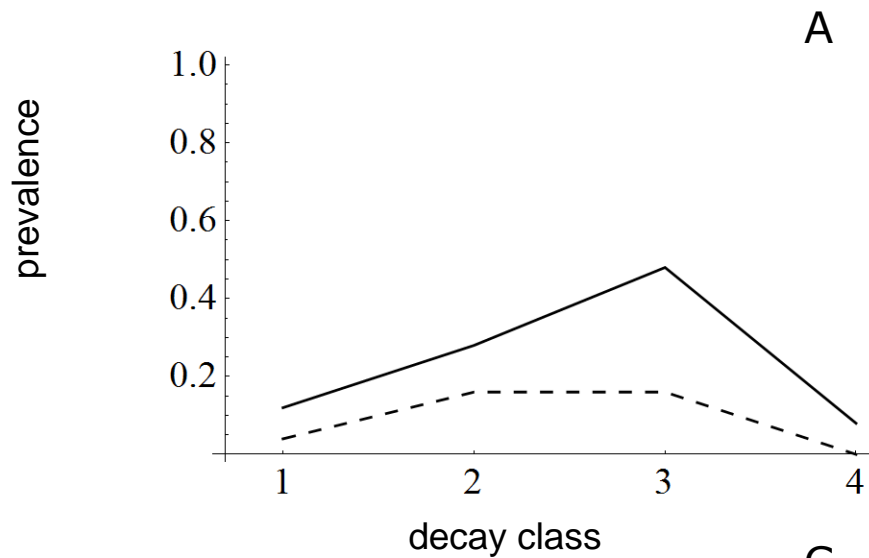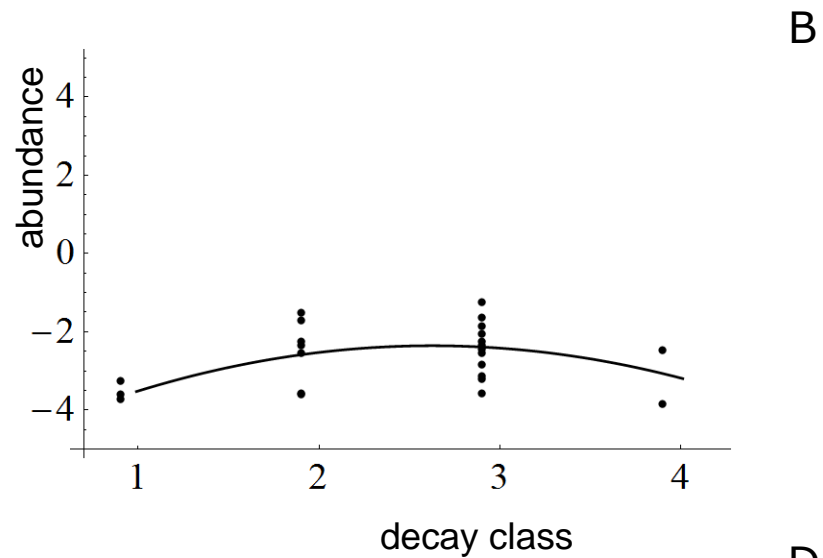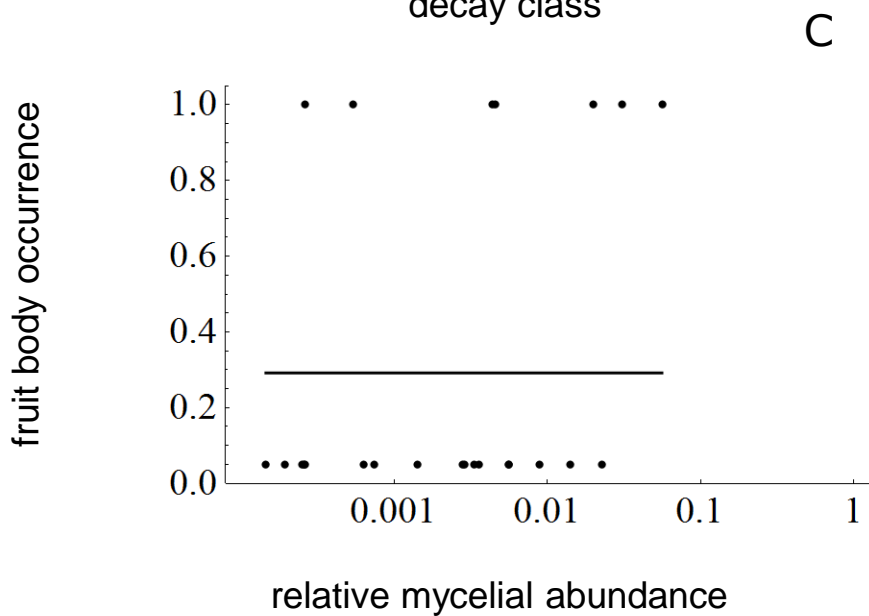

*Hyphoderma praetermissum*

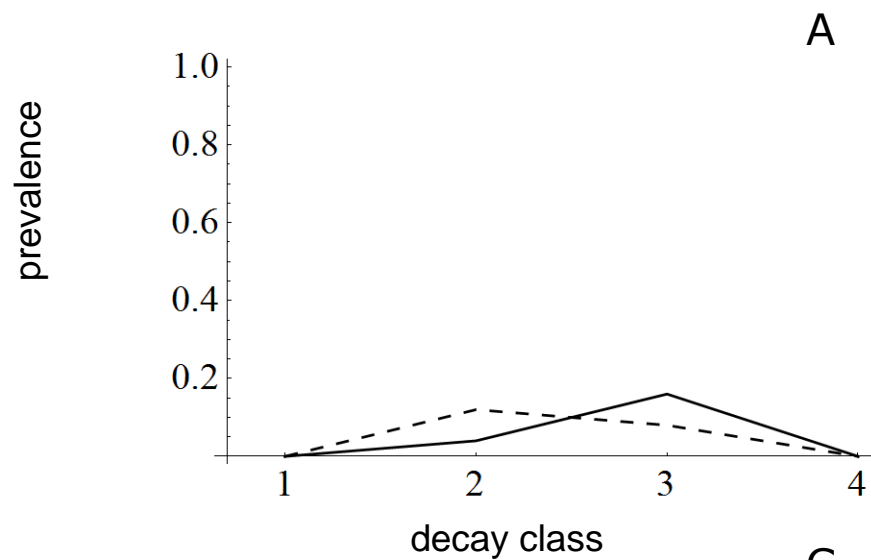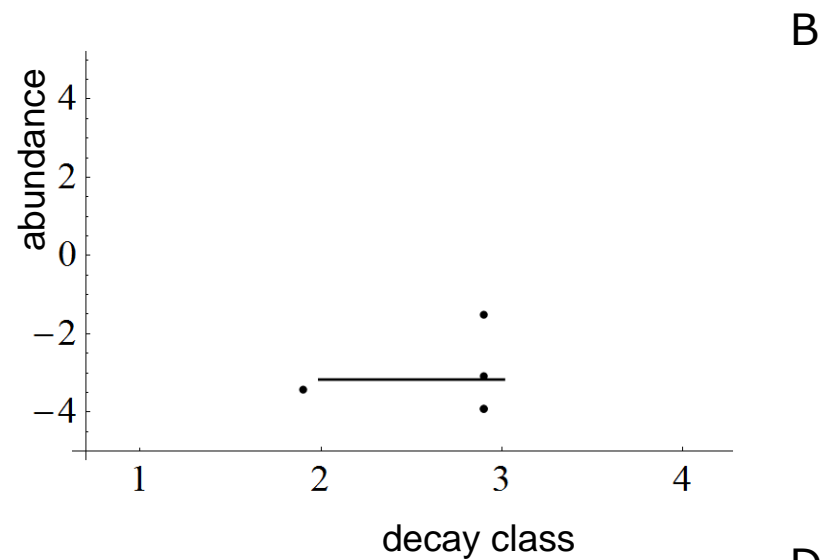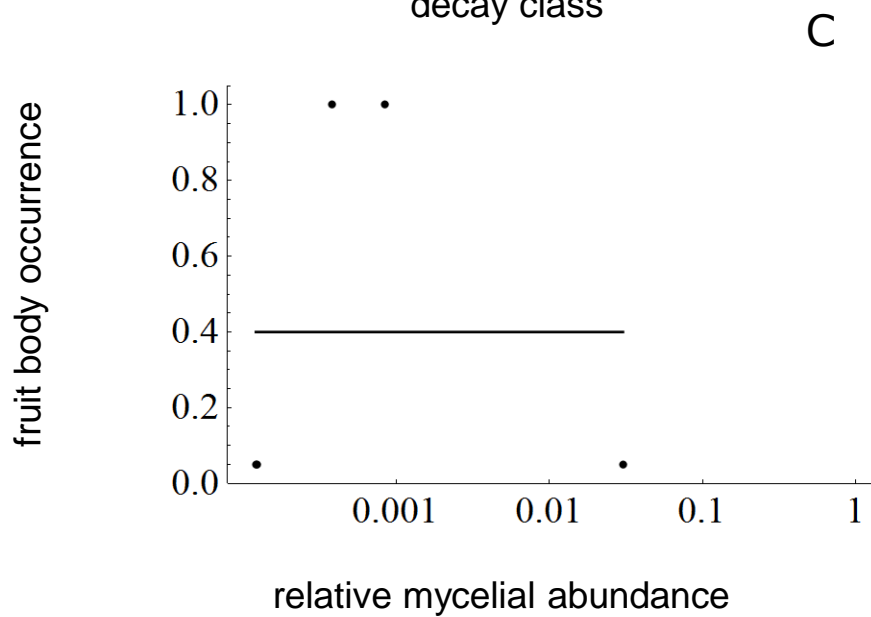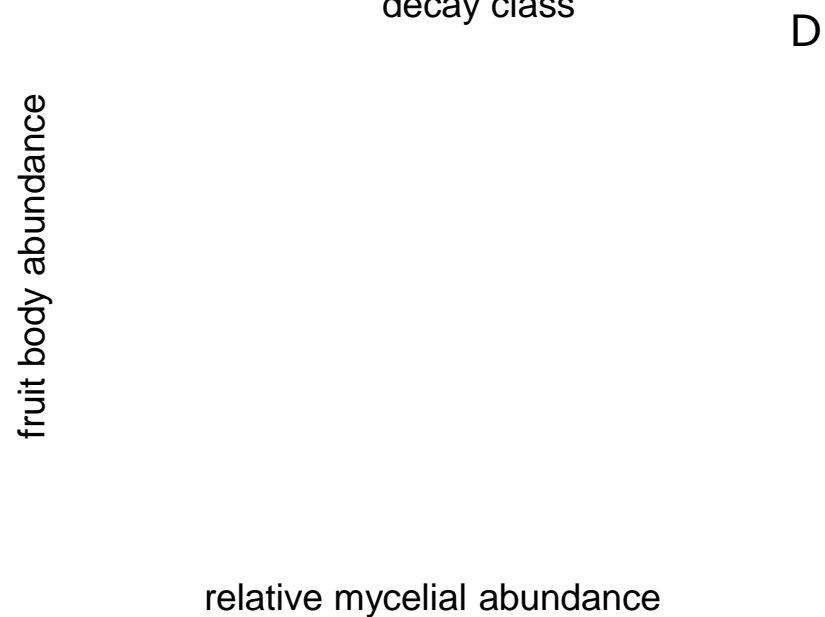

*Hyphodontia hastata*





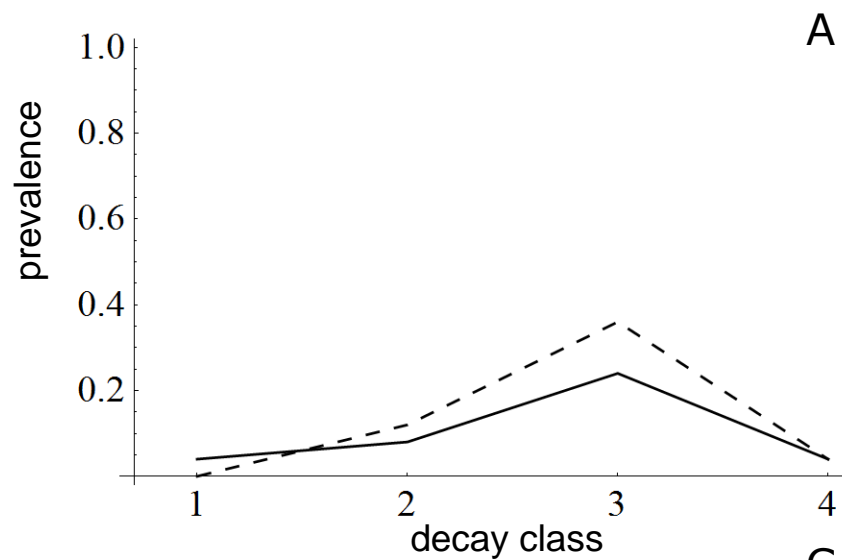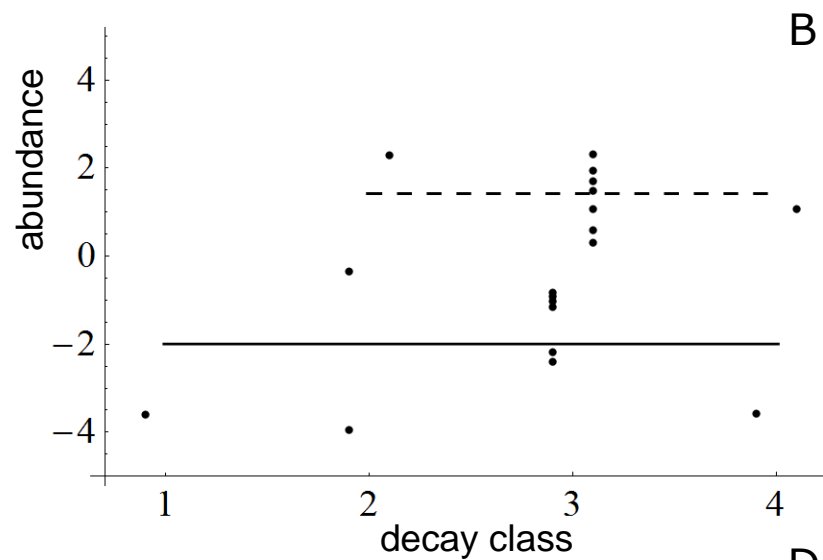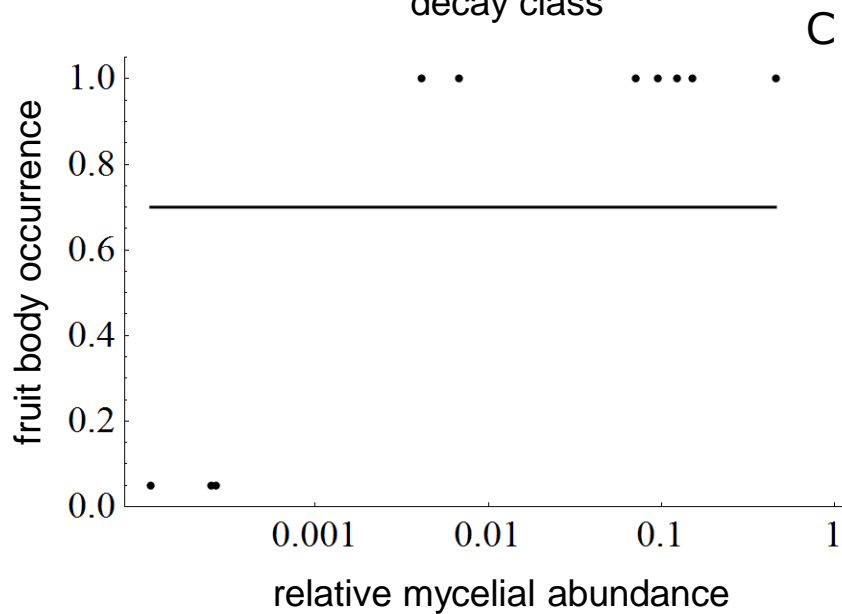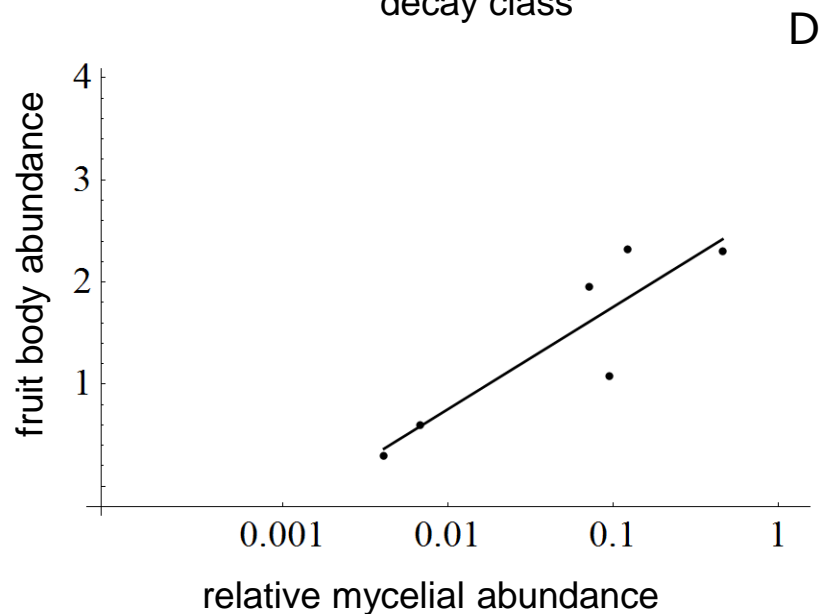

*Junghuhnia luteoalba*

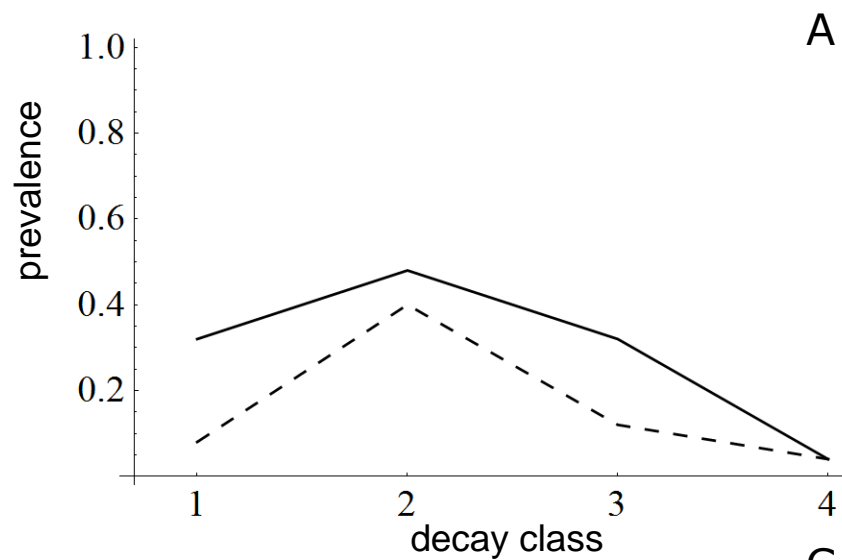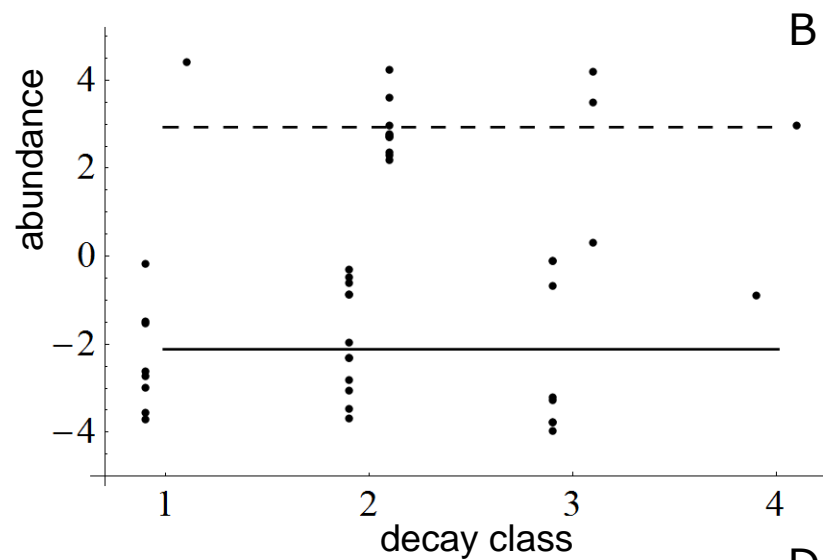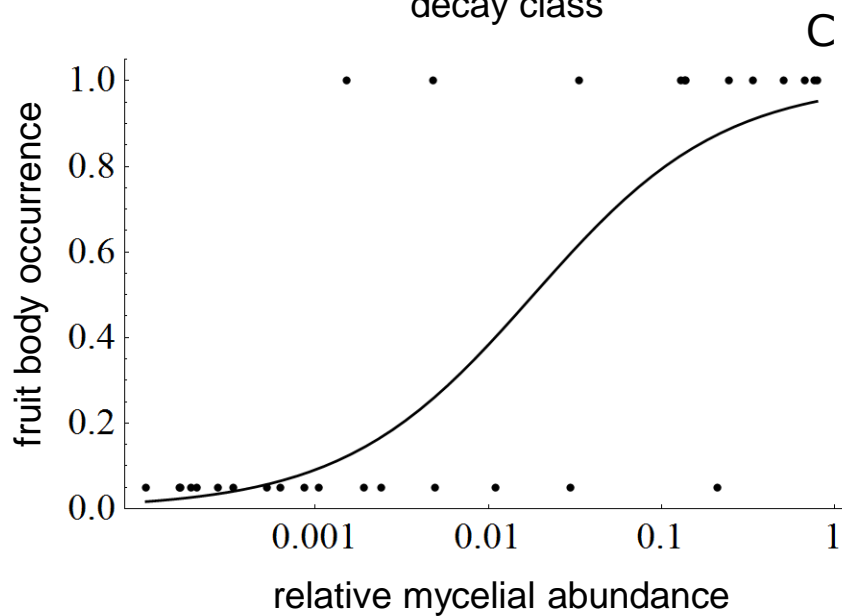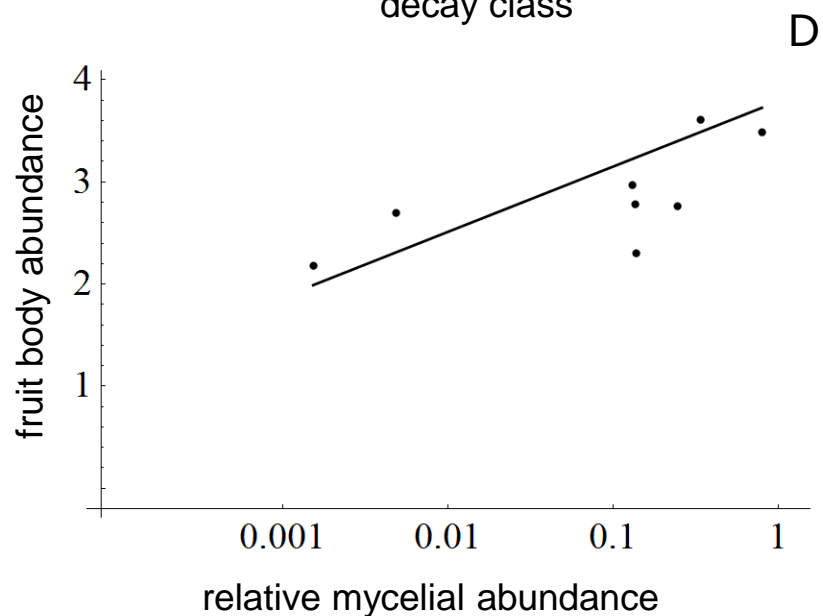

*Phellinus ferrugineofuscus*



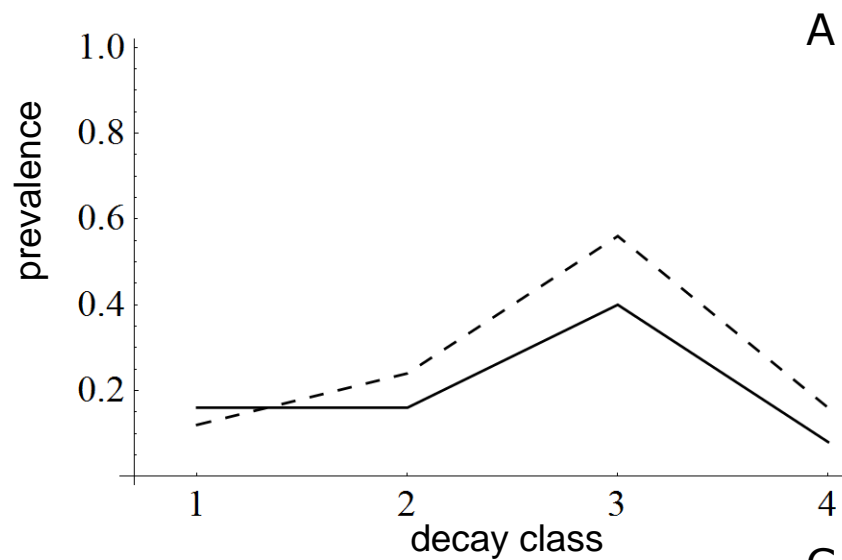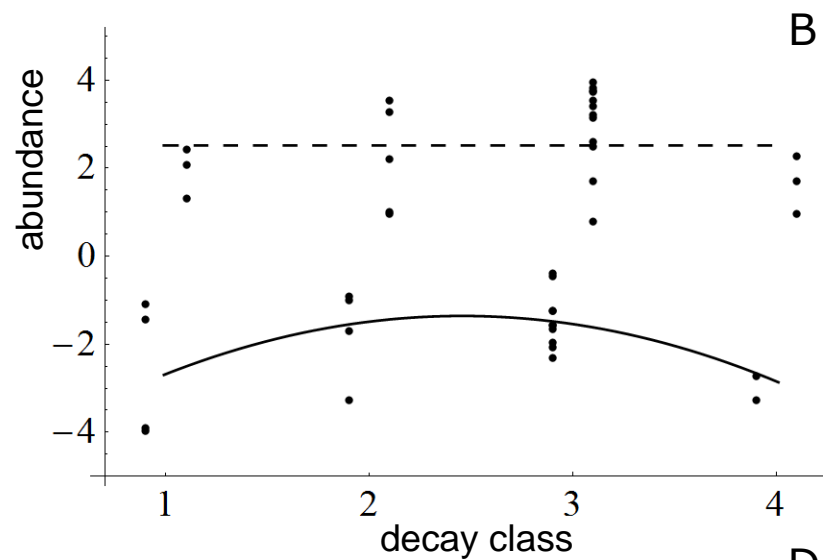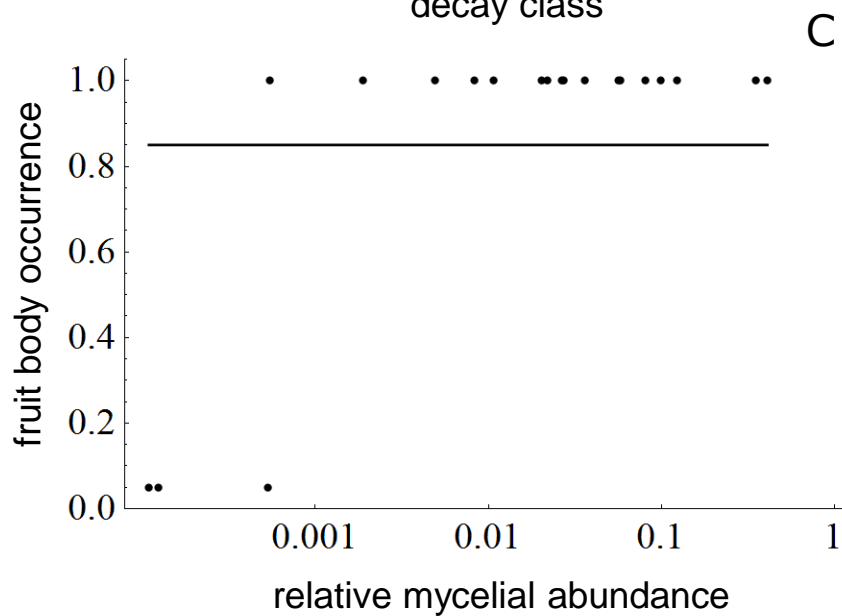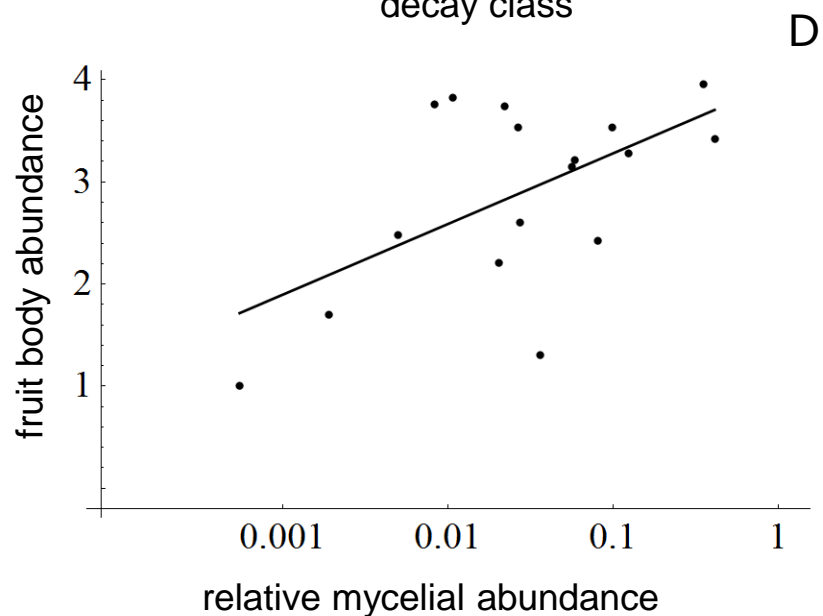

*Phellinus viticola*

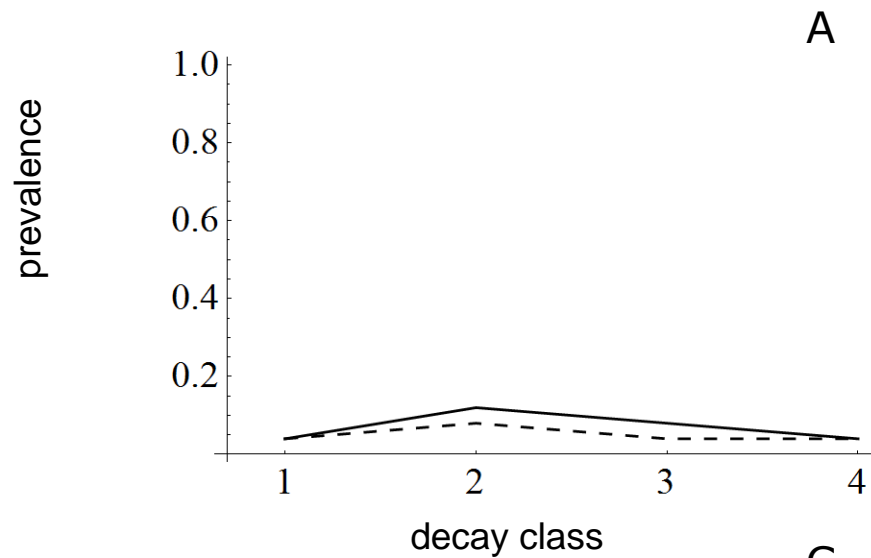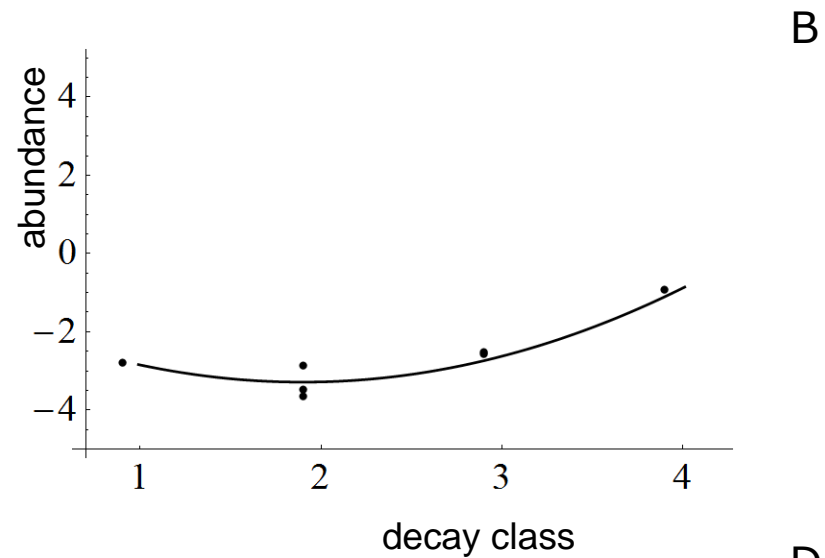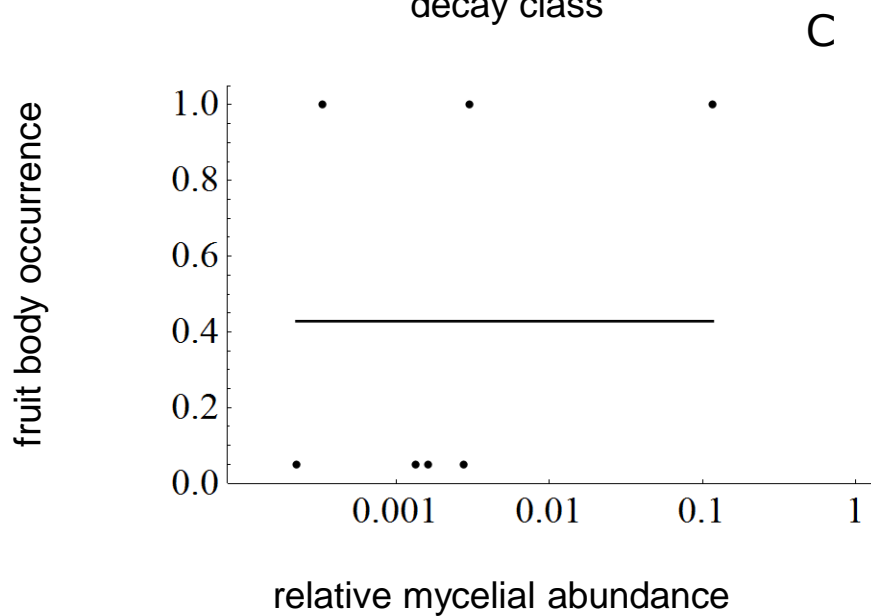

*Phlebia livida*

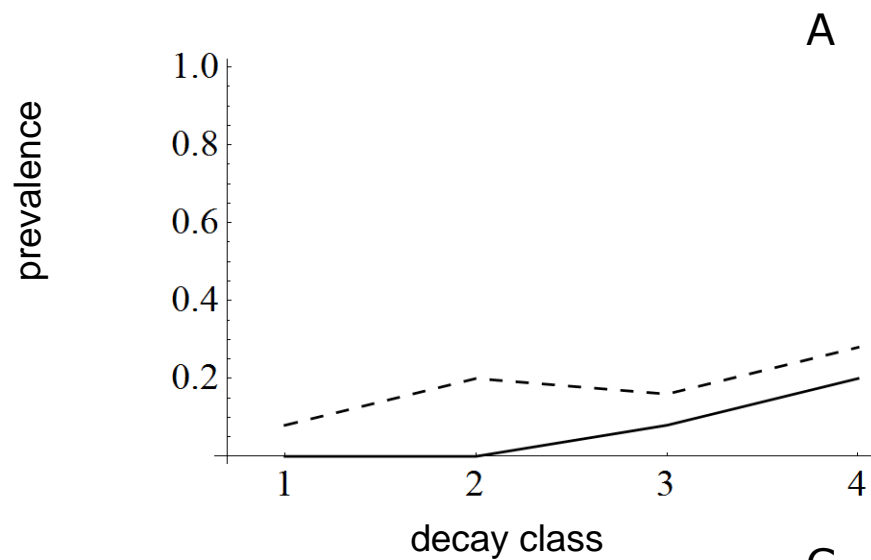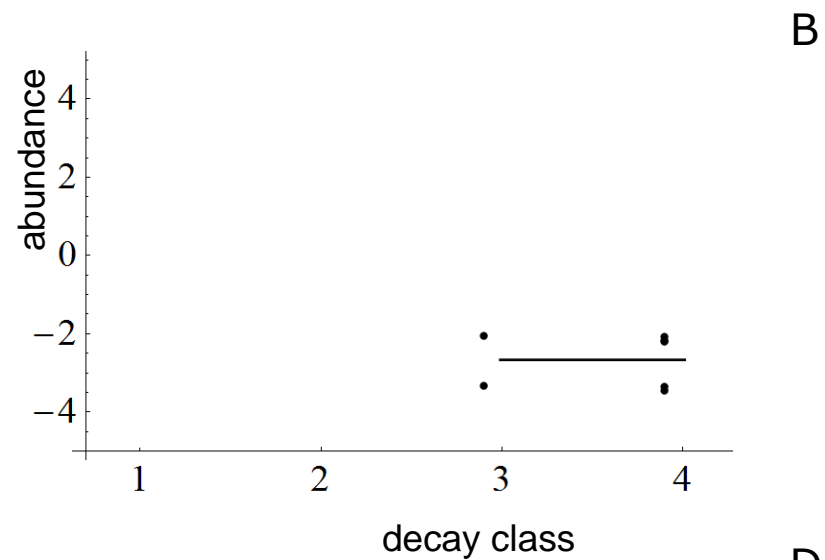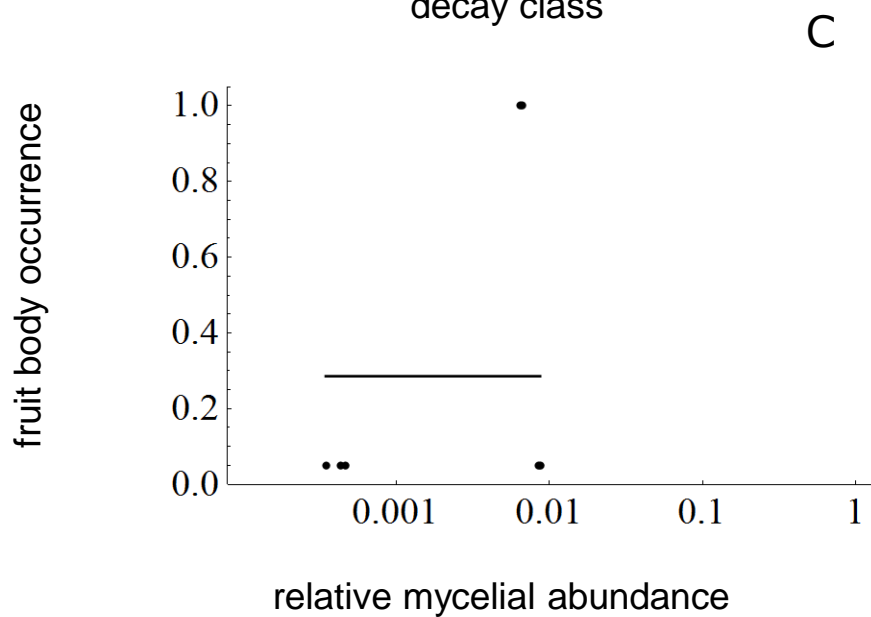

*Piloderma byssinum*



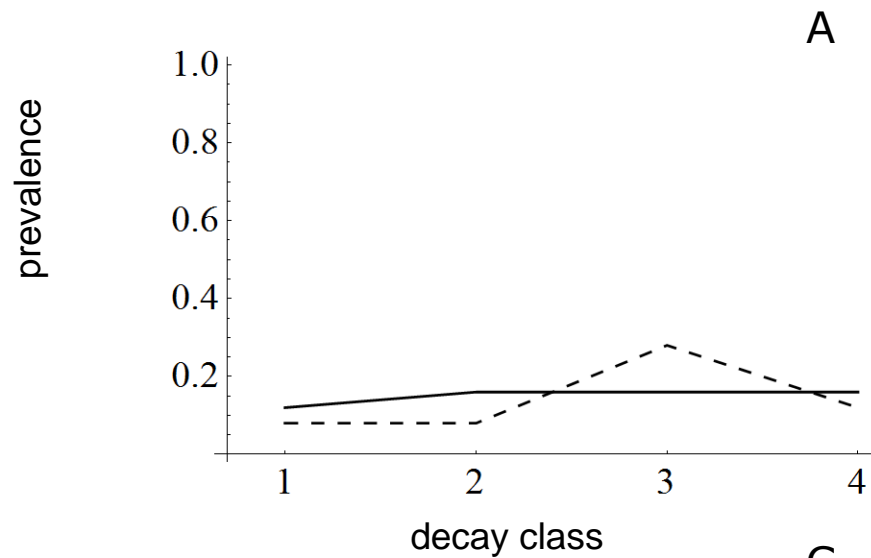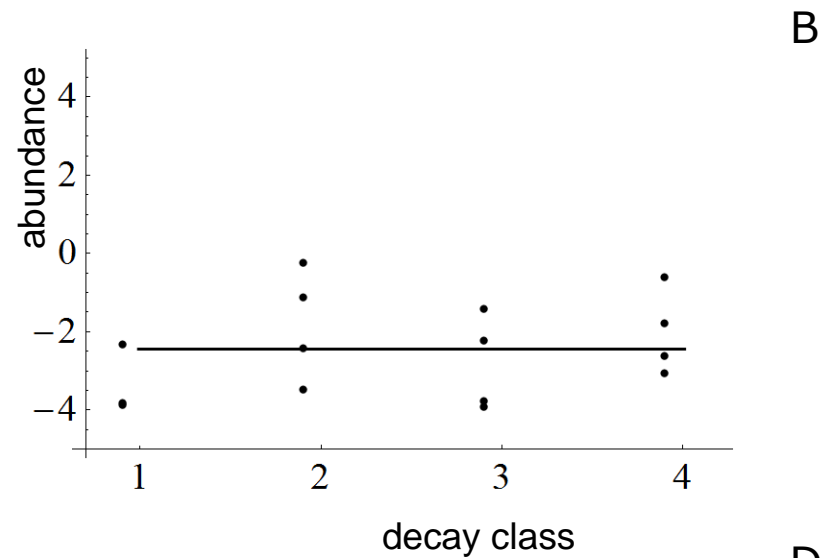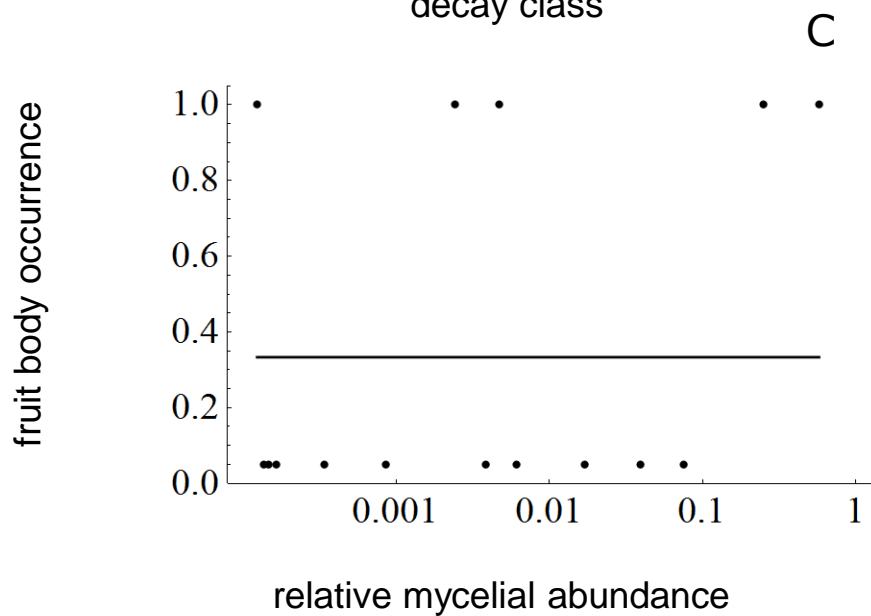

Resinicium bicolor



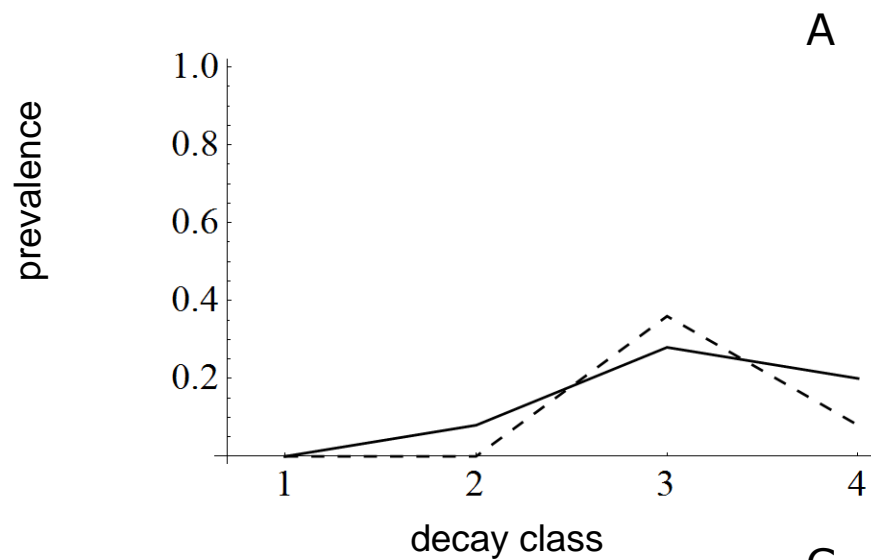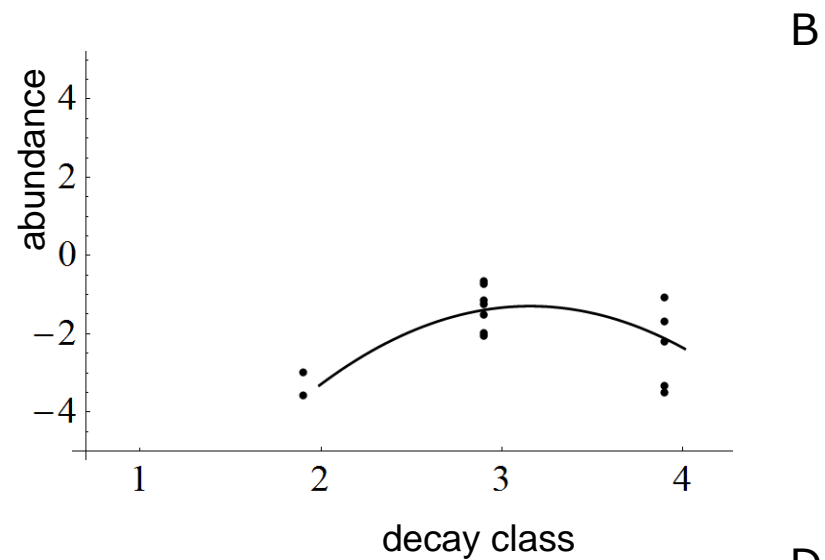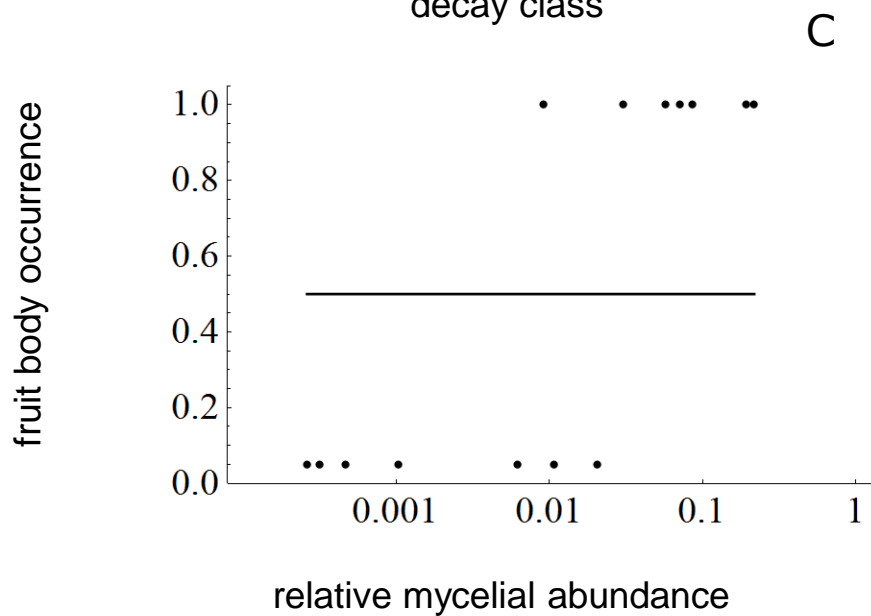

*Resinicium furfuraceum*

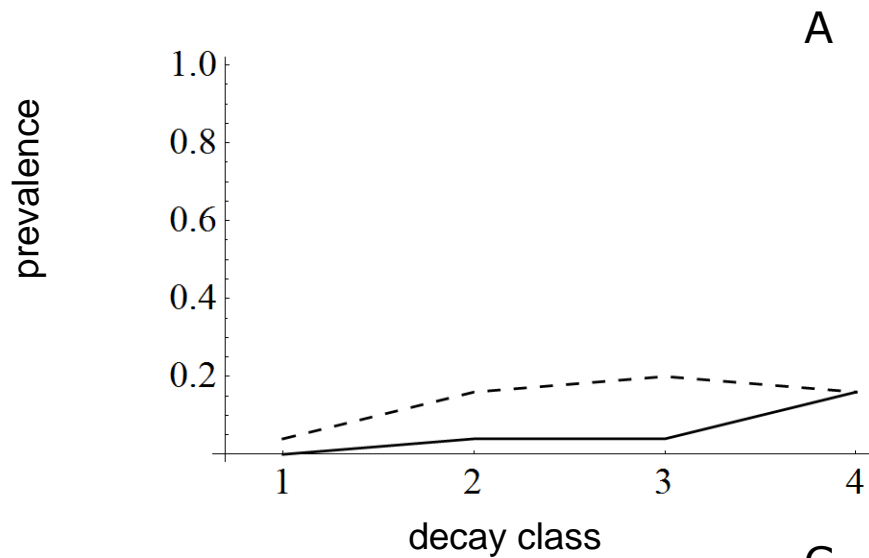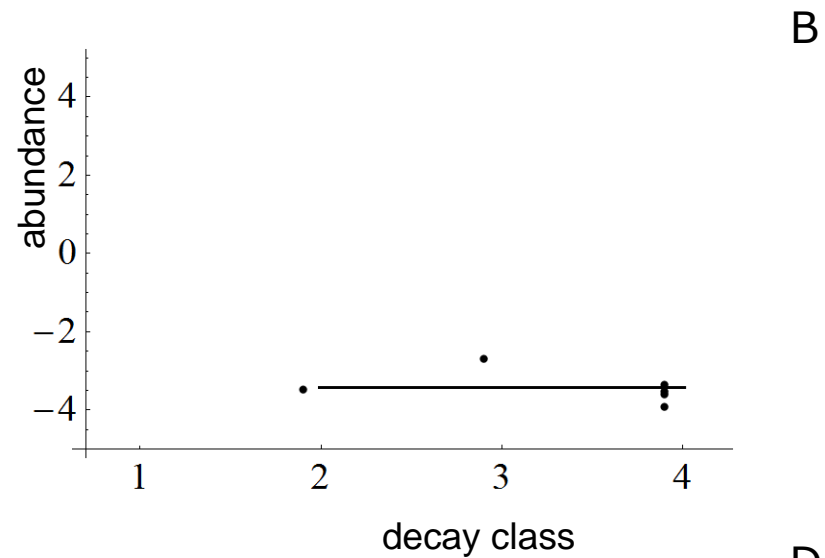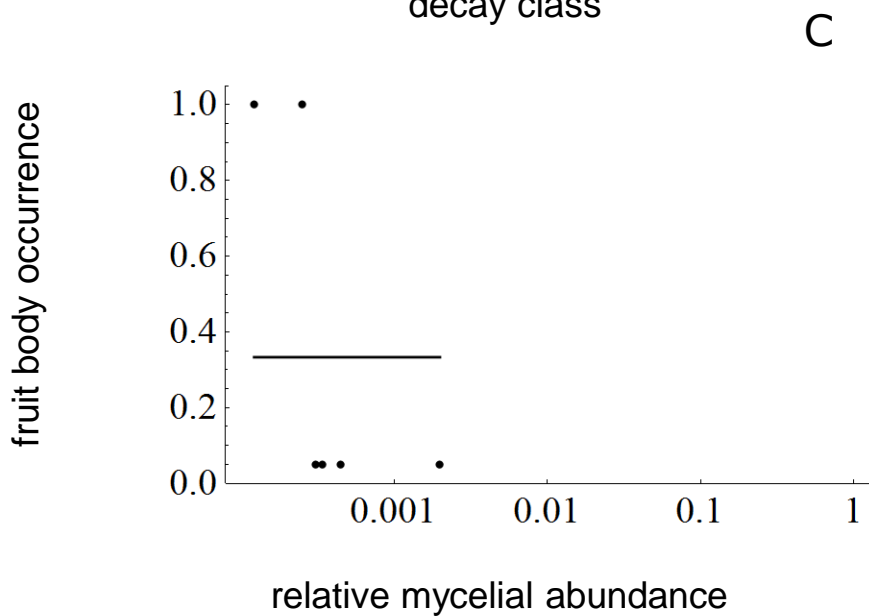

*Tomentellopsis echinospora*

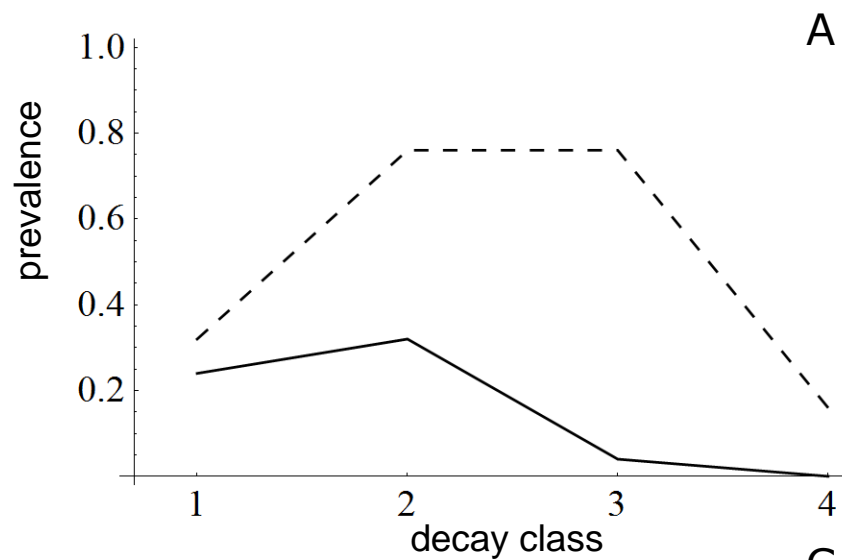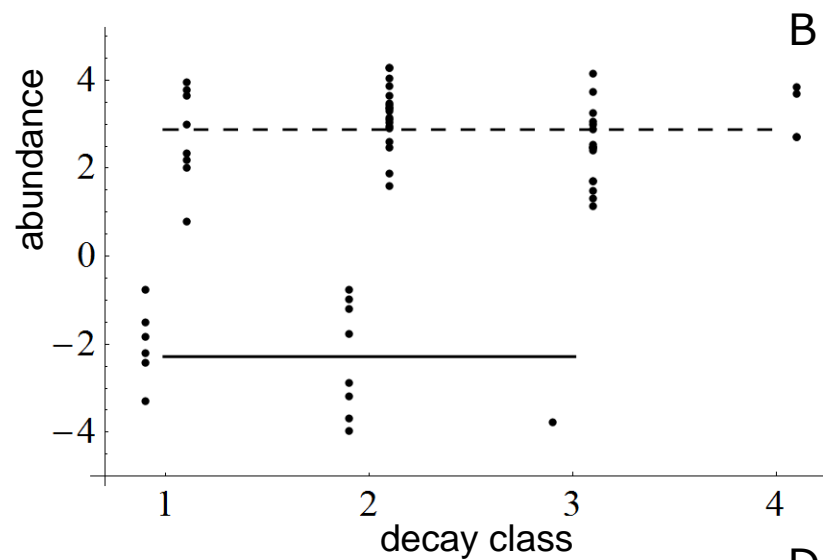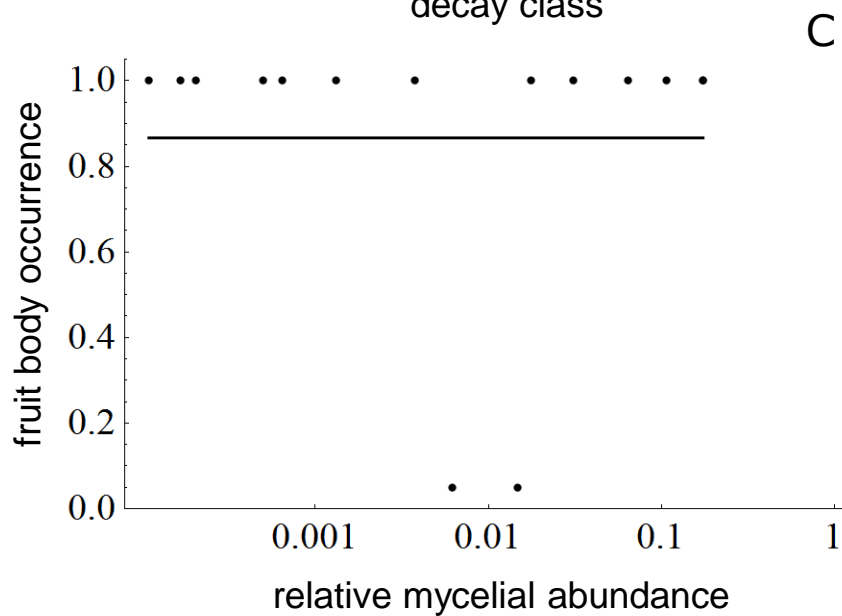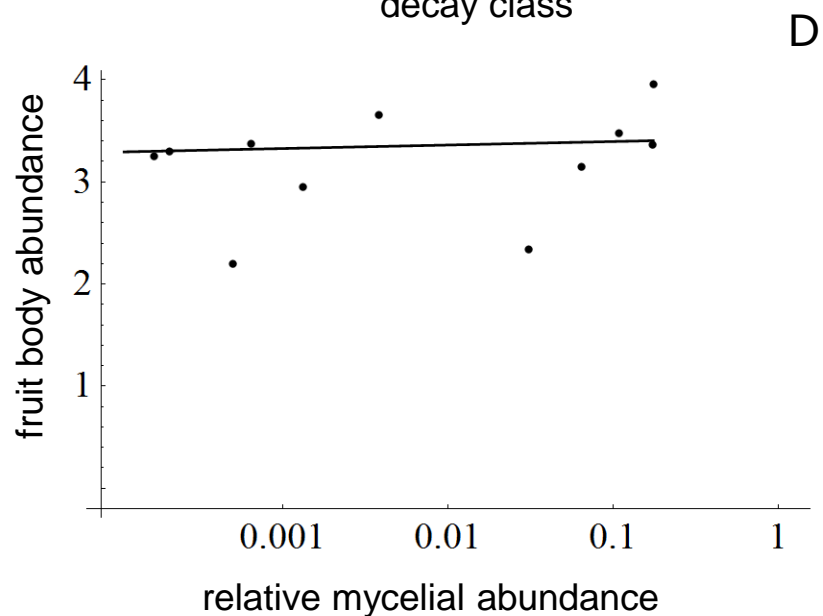

*Trichaptum abietinum*

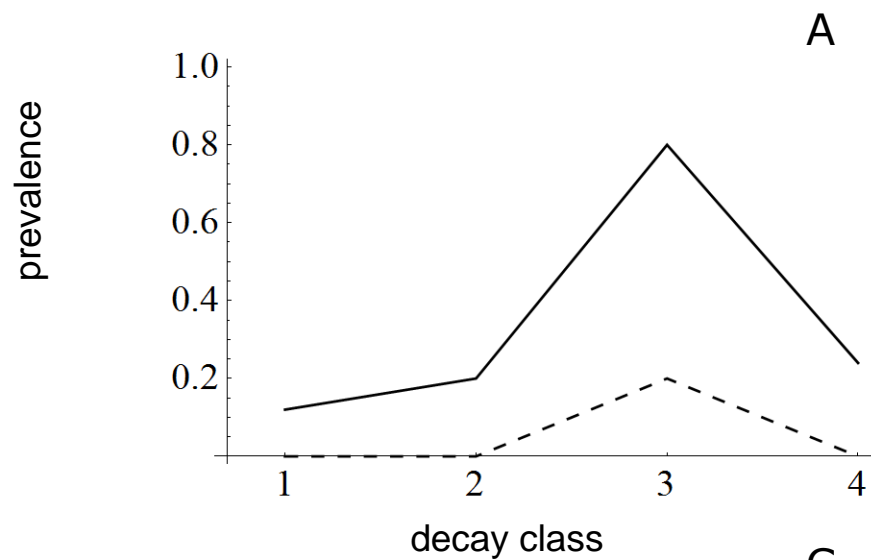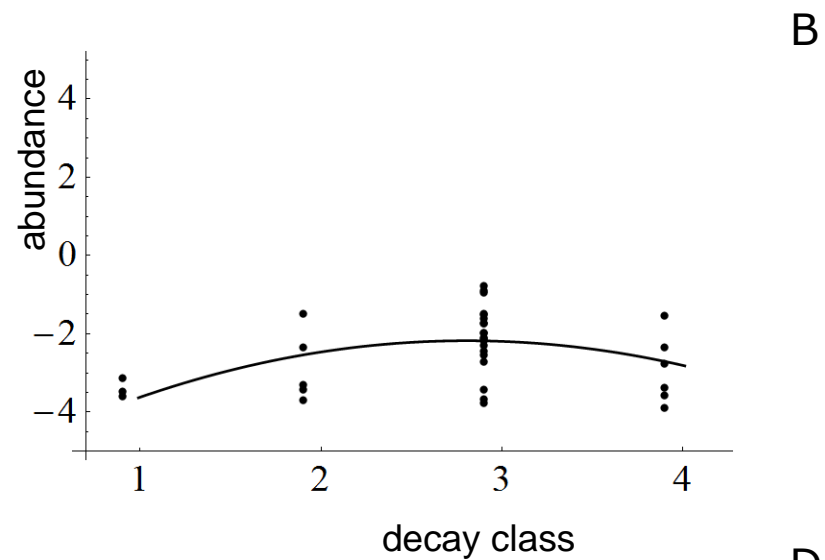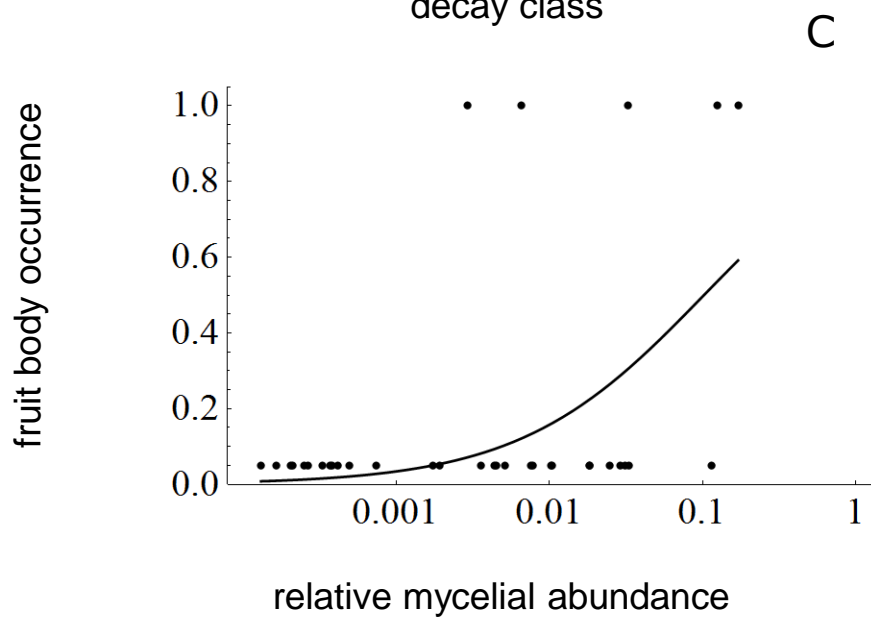

*Tubulicrinis borealis*

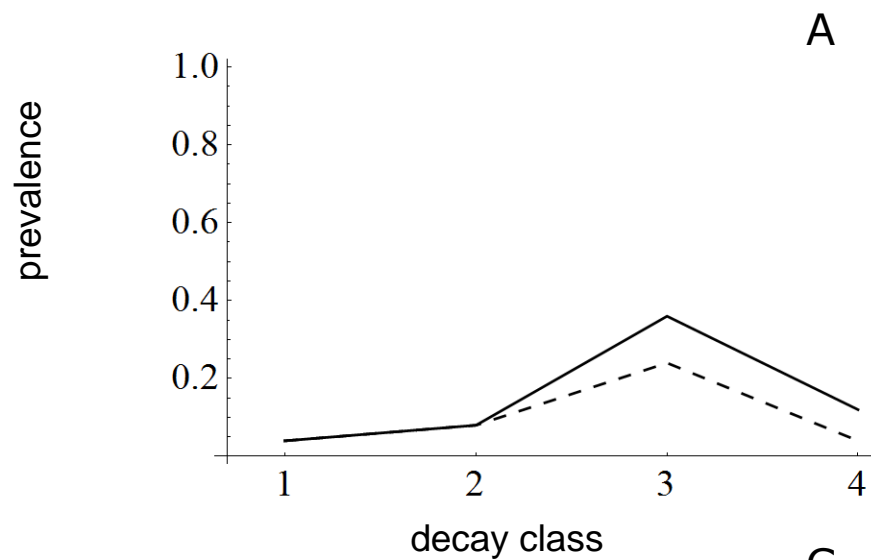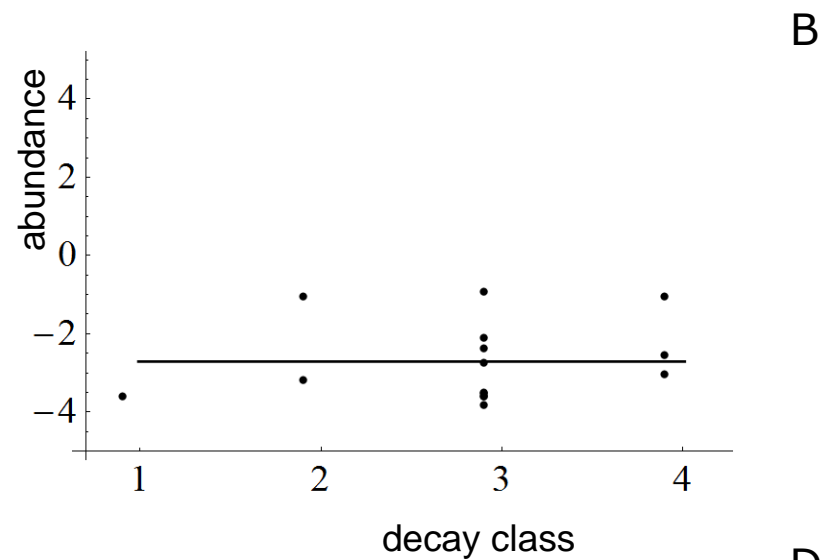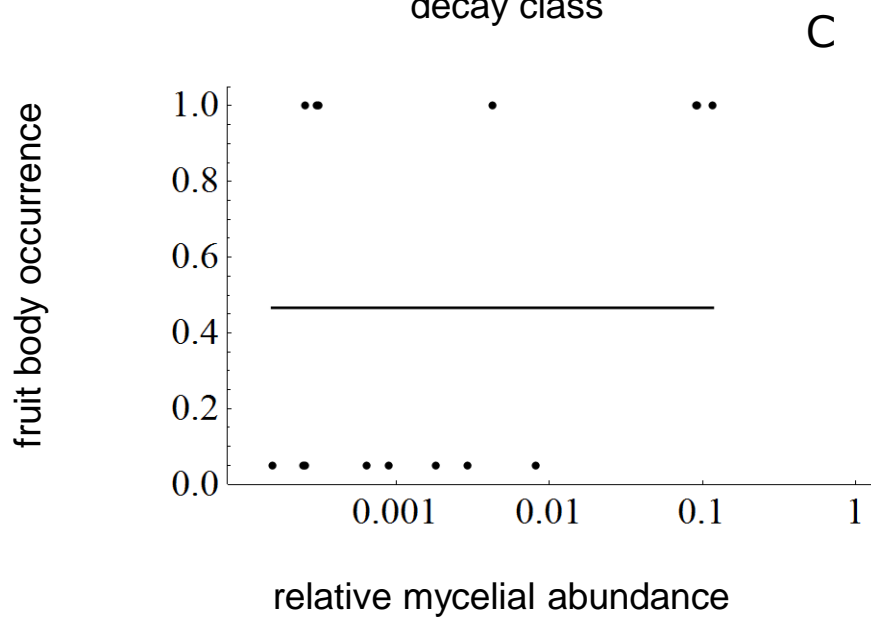

Tubulicrinis calothrix

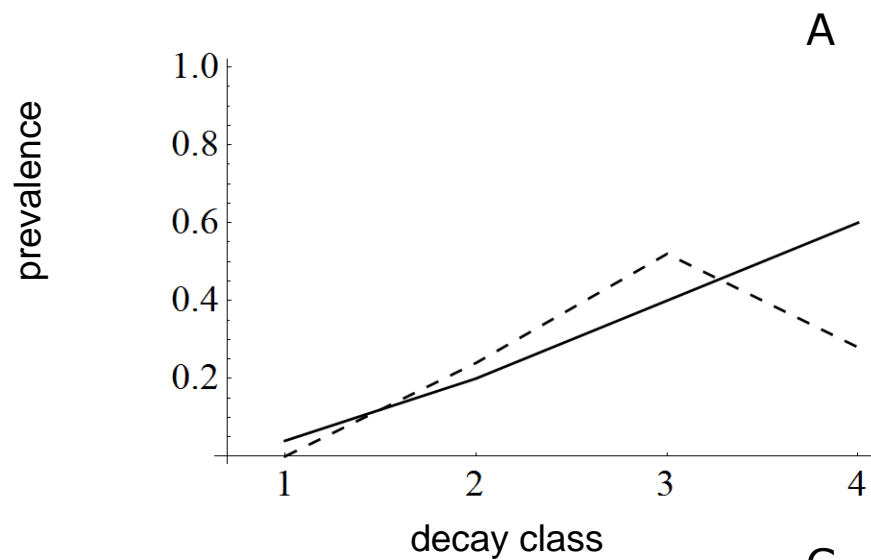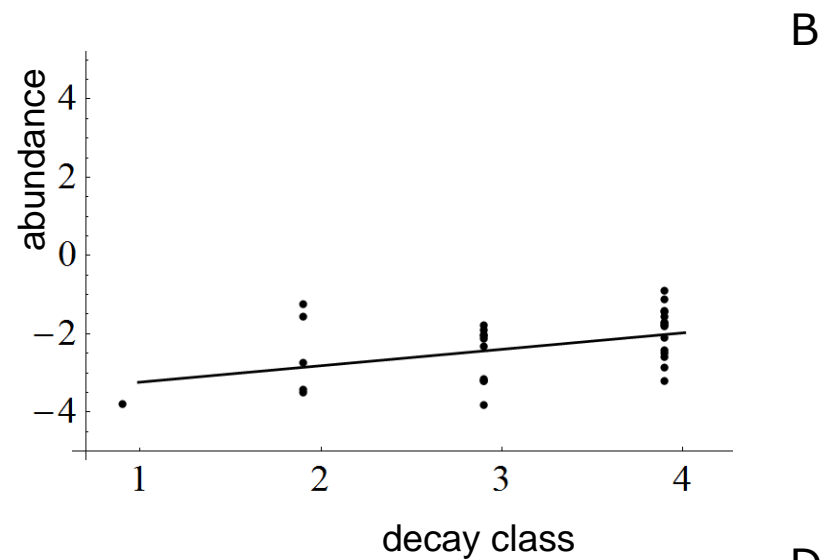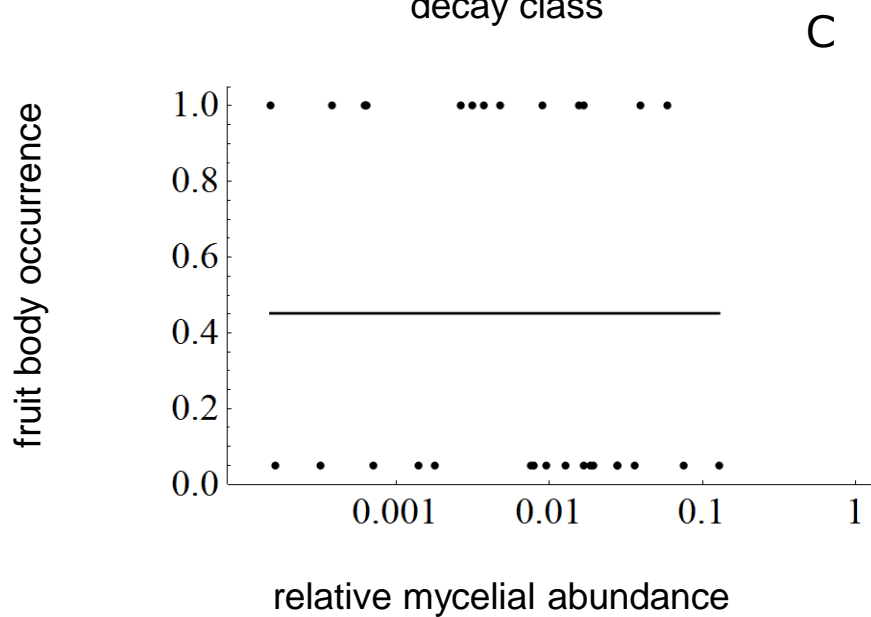

*Tylospora fibrillosa*
